# Supplementary material for: Role of ETS1 in the Transcriptional Network of Diffuse Large B Cell Lymphoma of the Activated B Cell-Like Type
Source: Cancers (Basel). 2020 Jul 15;12(7):1912. doi: 10.3390/cancers12071912 (PMC7409072; doi:10.3390/cancers12071912)
Supplement: Supplementary file 1 [file cancers-12-01912-s001.zip › Table S2.xlsx]

## Sheet: Limma_ETS1vsCTR_GEP
GeneSymbol	logFC	P.Value	adj.P.Val	DEFINITION
ETS1	-1.13593	4.54019e-12	1.34069e-07	Homo sapiens v-ets erythroblastosis virus E26 oncogene homolog 1 (avian) (ETS1)
GMFG	-0.715401	2.05495e-08	0.00021464	Homo sapiens glia maturation factor, gamma (GMFG)
HCST	-0.598778	3.32883e-08	0.000260772	Homo sapiens hematopoietic cell signal transducer (HCST)
CD52	-0.525172	9.49699e-06	0.024799	Homo sapiens CD52 molecule (CD52)
ARHGAP9	-0.52338	8.55711e-12	1.34069e-07	Homo sapiens Rho GTPase activating protein 9 (ARHGAP9)
FAIM3	-0.491868	5.026e-06	0.0196862	Homo sapiens Fas apoptotic inhibitory molecule 3 (FAIM3)
LOC387882	-0.370913	1.8119e-06	0.00811084	Homo sapiens hypothetical protein (LOC387882)
LTB	-0.346107	5.96628e-08	0.000373907	Homo sapiens lymphotoxin beta (TNF superfamily, member 3) (LTB)
SASH3	-0.318571	2.58729e-05	0.032464	Homo sapiens SAM and SH3 domain containing 3 (SASH3)
PVRIG	-0.272239	1.48067e-07	0.000773282	Homo sapiens poliovirus receptor related immunoglobulin domain containing (PVRIG)
PRAGMIN	-0.268178	1.09296e-05	0.0254227	Homo sapiens homolog of rat pragma of Rnd2 (PRAGMIN)
LOC100134304	-0.251962	7.16337e-05	0.0467634	PREDICTED: Homo sapiens similar to hCG1983233 (LOC100134304)
VGF	-0.234252	4.86934e-05	0.0432621	Homo sapiens VGF nerve growth factor inducible (VGF)
FERMT3	-0.232916	3.0339e-05	0.0330604	Homo sapiens fermitin family homolog 3 (Drosophila) (FERMT3), transcript variant URP2SF
LOC728835	-0.2185	2.58936e-05	0.032464	PREDICTED: Homo sapiens similar to cytokine, transcript variant 3 (LOC728835)
RAB40B	0.21474	1.68632e-05	0.0302184	Homo sapiens RAB40B, member RAS oncogene family (RAB40B)
PHLDA1	0.215803	4.97027e-05	0.0432621	Homo sapiens pleckstrin homology-like domain, family A, member 1 (PHLDA1)
LOC728816	0.22859	6.57852e-05	0.0467634	PREDICTED: Homo sapiens hypothetical LOC728816 (LOC728816)
TEAD2	0.239027	2.24908e-05	0.032034	Homo sapiens TEA domain family member 2 (TEAD2)
TNFRSF17	0.239049	3.09481e-05	0.0330604	Homo sapiens tumor necrosis factor receptor superfamily, member 17 (TNFRSF17)
CREB3L2	0.251968	2.59008e-05	0.032464	Homo sapiens cAMP responsive element binding protein 3-like 2 (CREB3L2)
KLF13	0.303753	6.15423e-06	0.021427	Homo sapiens Kruppel-like factor 13 (KLF13)

## Sheet: CustomIOR_CTR
NAME	SIZE	NES	NOM p-val	FDR q-val	Source
ETS1SIRNA_ABC_DLBCL_DN	22	3.03723	0	0	CustomIOR
UP_BY_ANTI-CD20_AND_ANTI-BCR_IN_GCBDLBCL_SUDHL7_PMID21364752	144	2.2583	0	0	CustomIOR
MCL_PROLIFERATION_SIGNATURE_PMID27846393	16	2.24244	0	0	CustomIOR
UP_BY_BCR_STIMULATION_IN_SUDHL7_REC1_Z138_OCILY18_PMID21364752	22	2.2277	0	0	CustomIOR
DOWNREGULATED_IN_KMT2D_KO_C_1-CRE_MOUSE_PMID26366712	15	2.0607	0	0.00215798	CustomIOR
OTX015_MCL_DN	33	2.03657	0	0.00279075	CustomIOR
DLBCL_CLUSTER_4_FIG5_PMID29713087	24	2.01091	0.00621118	0.0038198	CustomIOR
IBRUTINIB_ABC_DLBCL_DOWN_PMID29066507	176	2.0106	0	0.00334232	CustomIOR
PIMASERTIB_DOWN_OCILY10_PMID26961147	305	1.9331	0	0.00663767	CustomIOR
UP_IN_MALT_TRANSLOCATED_VS_NONTRANSLOCATED_MALT_PMID18974375	150	1.91613	0	0.00716598	CustomIOR
CHK1_RES_JEKO_UP_PMID26439697	157	1.91558	0	0.00660315	CustomIOR
CD37_POS_CORR_TOP100_GSE10846_RCHOP_GCB	98	1.90114	0.002	0.00703166	CustomIOR
UP_BY_ANTI-CD20_AND_ANTI-BCR_IN_MCL_REC1_PMID21364752	157	1.87007	0	0.00953059	CustomIOR
DOWN_CIGLITAZONE_OVARIAN_CANCER_CELL_LINES_PMID17032502	159	1.85588	0	0.0100135	CustomIOR
DUVELISIB_ABC_DLBCL_DOWN_PMID29066507	59	1.80469	0.00430108	0.0145798	CustomIOR
HIGH_IN_CLL_CLUSTER1_VS_CLUSTER2_PMID24265505	215	1.80125	0	0.0140258	CustomIOR
ST7612AA1_UP_DLBCL_PMID25671299	242	1.78727	0	0.0149176	CustomIOR
CD37_INV_CORR_TOP100_GSE10846_CHOP_GCB	95	1.74572	0	0.0202957	CustomIOR
IMMUNE_DLBCL_GENES_PMID15550490	677	1.74329	0	0.019428	CustomIOR
UP_BY_ANTI-CD20_AND_ANTI-BCR_IN_SUDHL7_REC1_PMID21364752	19	1.72277	0.0160966	0.0221713	CustomIOR
T_CELLS_LIGAND_RECEPTORS_PMID28783718	16	1.69808	0.0223124	0.0259273	CustomIOR
LOWMETHYLATED_AND_UPREGULATED_GENES_BY_DECITABINE_IN SMZL_CELL_LINES_PMID25612624	91	1.68361	0.00613497	0.0280672	CustomIOR
IFN_INDUCED_BY_LENALIDOMIDE_GENES_PMID27799566	70	1.68044	0.00607287	0.0275412	CustomIOR
DOWNREGULATED_IN_KMT2D_KO_CD19-CRE_MOUSE_PMID26366712	76	1.67904	0.00208333	0.0268509	CustomIOR
ST7612AA1_DOWN_DLBCL_PMID25671299	241	1.66259	0	0.0291765	CustomIOR
JQ1_B_ALL_DN_PMID22904298	28	1.65271	0.0160321	0.0309092	CustomIOR
DOWN_RITUXIMAB_PLUS_ACADESINE_MCL_JEKO1_PMID24519895	480	1.6514	0	0.0301049	CustomIOR
DOWN_IN_YK4279_TREATED_LUCAP35_PMID28668826	16	1.62734	0.0266393	0.0353146	CustomIOR
MUTATED_GENES_DLBCL_FIG1A_PMID29713087	92	1.61913	0.00628931	0.0362691	CustomIOR
LOWMETHYLATED_AND_UPREGULATED_GENES_IN_SMZL_VS_NONTUMORALSPLEEN_PMID25612624	89	1.60969	0.00194175	0.03826	CustomIOR
NFKB_GENES_INDUCED_BYIRF4_SPIB_PMID27799566	198	1.60434	0	0.0383775	CustomIOR
DOWNREUGLATED_IN_FL_WITH_KMT2D_MUTATIONS_PMID26366710	429	1.60332	0	0.0374552	CustomIOR
GENES_DOWN_AFTER_IRF4_KNOCKDOWN_IN_ABC_DLBCL_HBL1_PMID27799566	429	1.60261	0	0.0365565	CustomIOR
IMMUNOINHIBITORY_MOLECULES_PMID28052254	23	1.60252	0.0246407	0.0354813	CustomIOR
HMGA_POSITIVE_TARGETS_FUSCO	24	1.59046	0.0176125	0.0378827	CustomIOR
JQ1_SIGNATURE_PMID27099234	371	1.56693	0	0.0438584	CustomIOR
IDELALISIB_ABC_DLBCL_DOWN_PMID29066507	250	1.55424	0	0.0471067	CustomIOR
IEGS33_LYMPHOMA_IMMUNE_ESCAPE_GENE_SET_PMID27622044	33	1.54348	0.0392562	0.0494921	CustomIOR
GSE10846_RCHOP-ABC_ETS1_TOP100_UP	100	1.52633	0.0162602	0.0540497	CustomIOR
ITFB_DOWN_DLBCL_TOP250_PMID25671298	217	1.50749	0.00389864	0.0605679	CustomIOR
CHIP_FLI1_HBL1	65	1.49757	0.0281125	0.0617337	CustomIOR
GSE10846_CHOP-GCB_ETS1_TOP100_UP	93	1.49386	0.0144033	0.0615722	CustomIOR
AICDA_OFF_TARGETS_INDUCED_BY_IDELALISIB_AND_DUVELISIB_PMID28199309	50	1.49243	0.0260304	0.0606067	CustomIOR
JQ1_CD4T_DN	76	1.4714	0.0214425	0.0672783	CustomIOR
DLBCL_DRIVER_GENES_PMID28985567	148	1.45895	0.0144628	0.0711786	CustomIOR
LOWMETHYLATED_GENES_IN_SMZLHIGHM_VS_SMZLLOWM_PMID25612624	1158	1.45676	0	0.0706544	CustomIOR
CD37_INV_CORR_TOP100_GSE10846_RCHOP_ABC	86	1.45191	0.0186335	0.071227	CustomIOR
GSE10846_CHOP-GCB_ETS1_TOP100_DOWN	94	1.43104	0.0141414	0.078727	CustomIOR
AZD8835_UP_ABCDLBCL_PMID28202458	82	1.42647	0.0345528	0.0797829	CustomIOR
CD205_CORRELATED_GENES	331	1.41913	0.00403226	0.0821649	CustomIOR
UPREGULATED_IN_BENDAMUSTINE_CLL_PMID26701728	121	1.41463	0.0230608	0.0828282	CustomIOR
GENES_DLBCL_NGS_TARGET_PANEL_TABLES2_PMID28804123	103	1.39252	0.0297872	0.0935453	CustomIOR

## Sheet: CustomIOR_ETS1KD
NAME	SIZE	NES	NOM p-val	FDR q-val	Source
IDELALISIB_ABC_DLBCL_UP_PMID29066507	155	-2.51624	0	0	CustomIOR
PLASMACELL_GENES_INDUCED_BYIRF4_SPIB_PMID27799566	94	-2.48576	0	0	CustomIOR
OTX015_SMZL_UP	26	-2.44174	0	0	CustomIOR
OTX015_MCL_UP	20	-2.31332	0	0.000229323	CustomIOR
BAY1238097_DLBCL_UP_PMID28653353	63	-2.30732	0	0.000183459	CustomIOR
IBRUTINIB_ABC_DLBCL_UP_PMID29066507	81	-2.29754	0	0.000152882	CustomIOR
DOWN_IN_MALT_TRANSLOCATED_VS_NONTRANSLOCATED_MALT_PMID18974375	111	-2.18352	0	0.000131042	CustomIOR
OTX015_DLBCL_UP_PMID25623213	50	-2.07063	0	0.000114662	CustomIOR
JQ1_NEUROBLASTOMA_UP_PMID23430699	41	-1.99383	0	0.00107185	CustomIOR
PIMASERTIB_UP_OCILY10_PMID26961147	211	-1.99194	0	0.000964669	CustomIOR
UPREGULATED_IN_KMT2D_KO_C_1-CRE_MOUSE_PMID26366712	40	-1.87997	0	0.00572565	CustomIOR
IL6_IL10_STAT3_GENES_REPRESSED_BYIRF4_SPIB_PMID27799566	164	-1.834	0	0.00862665	CustomIOR
TUNICAMYCIN_HIGH_UP_PMID29453283	474	-1.81827	0	0.00969237	CustomIOR
UP_CIGLITAZONE_OVARIAN_CANCER_CELL_LINES_PMID17032502	273	-1.80466	0	0.00999945	CustomIOR
DOWN_BY_ANTI-CD20_AND_ANTI-BCR_IN_GCBDLBCL_SUDHL7_PMID21364752	168	-1.77688	0	0.0132963	CustomIOR
JQ1_MM_BL_UP_PMID21949397	19	-1.76968	0.00929368	0.0129618	CustomIOR
DUVELISIB_ABC_DLBCL_UP_PMID29066507	49	-1.75131	0.0093985	0.015258	CustomIOR
JQ1_LUNG_ADENOCARCINOMA_UP_PMID23129625	20	-1.70377	0.0197628	0.0251588	CustomIOR
PQR309_ABC_DLBCL_UP_PMID29066507	307	-1.69872	0	0.0246889	CustomIOR
OTX015_ALCL_UP_PMID27793034	205	-1.69831	0	0.0235044	CustomIOR
GENES_UP_AFTER_SPIB_KNOCKDOWN_IN_ABC_DLBCL_HBL1_PMID27799566	162	-1.68979	0	0.0236467	CustomIOR
PQR309_GCB_DLBCL_UP_PMID29066507	494	-1.6793	0	0.0246719	CustomIOR
GENES_UP_AFTER_IRF4_KNOCKDOWN_IN_ABC_DLBCL_HBL1_PMID27799566	405	-1.67916	0	0.0235992	CustomIOR
THAPSIGARGIN_LOW_UP_PMID29453283	233	-1.67123	0	0.0241074	CustomIOR
ITFB_UP_DLBCL_TOP250_PMID25671298	226	-1.64263	0	0.0294659	CustomIOR
GENES_WITH_IRF4_CHIP-SEQ_PEAKS_IN_ABC_DLBCL_OCILY10_PMID24875472	2358	-1.63967	0	0.0292228	CustomIOR
PERK/ATF4_TARGETS_MOLINARI	152	-1.63418	0	0.0294042	CustomIOR
JQ1_MM_UP_PMID21889194	48	-1.63157	0.00585938	0.0289828	CustomIOR
CD37NEG_DOWN_VS_CD37POS_DLBCL_PMID27760757	37	-1.61899	0.0117647	0.0313267	CustomIOR
DOWN_PI3K_INHIBITOR_PMID28528867	993	-1.61798	0	0.0305846	CustomIOR
ITFA_UP_DLBCL_TOP250_PMID25671298	225	-1.61736	0	0.0297274	CustomIOR
IRE1/XBP1S_TARGETS_MOLINARI	82	-1.59884	0.00986193	0.0337549	CustomIOR
GENES_WITH_IRF4_CHIP-SEQ_PEAKS_IN_ABC_DLBCL_OCILY3_PMID24875472	466	-1.59109	0	0.034767	CustomIOR
FL_SIGNATURE_PMID28522579	16	-1.57306	0.0464217	0.0389634	CustomIOR
OTX015_DLBCL_DN_PMID25623213	50	-1.56911	0.00769231	0.0393714	CustomIOR
JQ1_LUNG_ADENOCARCINOMA_DN_PMID23129625	20	-1.55792	0.0372549	0.0420589	CustomIOR
UP_PI3K_INHIBITOR_PMID28528867	701	-1.54798	0	0.0441054	CustomIOR
PROTEIN_CODING_DRIVER_ELEMENTS_IDENTIFIED_IN_PCAWG__EXTFIG6_RHEINBAY_BIORXIV2017	144	-1.54383	0	0.0444423	CustomIOR
DOWN_BY_ANTI-CD20_AND_ANTI-BCR_IN_MCL_REC1_PMID21364752	230	-1.5251	0.00369686	0.0501375	CustomIOR
DOWN_IN_CD37NEG_DLBCL_PMID27760757	24	-1.50282	0.0454545	0.0579855	CustomIOR
CD37_POS_CORR_TOP100_GSE10846_CHOP_ABC	96	-1.49972	0.0139442	0.0579282	CustomIOR
UP_IN_CD37NEG_DLBCL_PMID27760757	47	-1.49012	0.0251451	0.0604775	CustomIOR
CHK1_RES_JEKO_DOWN_PMID26439697	665	-1.48829	0	0.0598729	CustomIOR
MCL_JQ1_DOWN_PMID26254443	22	-1.47976	0.0438413	0.0625467	CustomIOR
GENES_INDUCED_BYIRF4_SPIB_ABC_DLBCL_PMID27799566	156	-1.47525	0.00575816	0.0632169	CustomIOR
DOWNREGULATED_GENES_BY_DECITABINE_IN SMZL_CELL_LINES_PMID25612624	120	-1.45919	0.0122449	0.0681142	CustomIOR
DOWN_BY_ANTI-CD20_AND_ANTI-BCR_IN_SUDHL7_PMID21364752	41	-1.45392	0.0288066	0.0690671	CustomIOR
GENES_WITH_SPIB_CHIP-SEQ_PEAKS_IN_ABC_DLBCL_OCILY3_PMID24875472	1951	-1.45069	0	0.0690776	CustomIOR
MUTATIONS_TCGA_EVENTS_MINA2017	165	-1.44158	0.00961539	0.0719145	CustomIOR
GENES_OVERLAPPING_IRF4_SPIB_BIOTAG_CHIP-SEQ_PEAKS_IN_ABC_DLBCL_HBL1_PMID27799566	3383	-1.43434	0	0.0716161	CustomIOR
PQR309_GCB_DLBCL_DOWN_PMID29066507	563	-1.42785	0	0.0737756	CustomIOR
TUNICAMYCIN_HIGH_DOWN_PMID29453283	198	-1.39517	0.00400802	0.0880638	CustomIOR
MET500_SUPPRESSORS_PMID28783718	2506	-1.38969	0	0.0896692	CustomIOR
GENES_WITH_SPIB_CHIP-SEQ_PEAKS_IN_ABC_DLBCL_OCILY10_PMID24875472	669	-1.37878	0	0.0939291	CustomIOR
BCR_DLBCL_GENES_PMID15550490	538	-1.36445	0	0.09715	CustomIOR

## Sheet: STAUDT_CTR
NAME	SIZE	NES	NOM p-val	FDR q-val	Source
HEMATOPOIETIC_NODE1658	84	2.41597	0	0	Staudt
MCL_PROLIFERATION_SURVIVAL	16	2.19787	0	0.000612745	Staudt
CD40_UPREGULATED_BURKITT_LYMPHOMA	99	2.17875	0	0.000770816	Staudt
PROLIFERATION_NODE1618	57	2.15432	0	0.000578112	Staudt
NFKB_UP_ALL_OCILY3_LY10	67	2.11403	0	0.00152349	Staudt
NFKB_UP_BOTHOCILY3ANDLY10	39	2.11267	0	0.00126958	Staudt
T_NK_NODE1604	20	2.09849	0.0020202	0.00123458	Staudt
BLOOD_MODULE-2.8_T_CELLS	110	2.06323	0	0.00173153	Staudt
TCELL_PIREP_CALCIUMDEFPTUP4X_FESKE_FIG6	46	2.04113	0	0.00210885	Staudt
QUIESCENCE_HEME_CLUSTER1	148	2.04022	0	0.00199266	Staudt
MYELOMA_PR_SUBGROUP_UP	48	1.97586	0	0.00441313	Staudt
CLL_BCR_CROSSLINKING_UP_LYMPH_NODE_UP	27	1.96821	0.00208768	0.00441685	Staudt
THYMIC_DP_TCELL_GT_THYMIC_PROGENITOR_TCELL	62	1.94558	0	0.00535496	Staudt
KLF2_INDUCED	102	1.92892	0	0.00575705	Staudt
HIF1ALPHA_2X_DOWN	40	1.92504	0	0.00537325	Staudt
TCELL_PIREP4X_FESKE_FIG6	60	1.91426	0	0.00557429	Staudt
RESTING_BLOOD_B_CELL_GNF	80	1.87326	0	0.00815276	Staudt
TCELL_PIREP_CSAUP4X	21	1.86553	0.00400802	0.00819244	Staudt
TCELL_PIREP4X_FESKE_FIG4	25	1.84085	0	0.0103829	Staudt
CELL_CYCLE_LIU	234	1.83645	0	0.00996553	Staudt
BLIMP_BCELL_REPRESSED	64	1.81533	0	0.0116186	Staudt
DENDRITIC_CELL_BDCA1POS_BLOOD	25	1.79445	0.00406504	0.0129967	Staudt
PLASMA_CELL_GT_MATURE_BCELL	37	1.78882	0.00393701	0.0130203	Staudt
PI3K_OVEREXPRESSION_UP	102	1.78076	0	0.0138264	Staudt
NFKB_UP_K1106	17	1.75689	0.00403226	0.0166604	Staudt
SPLENIC_MARGINAL_ZONE_BCELL_GT_GC_BCELL	51	1.73918	0.0102459	0.0188343	Staudt
HIF1ALPHA_1.5X_DOWN	210	1.72772	0	0.020048	Staudt
KLF2_REPRESSED	109	1.70556	0	0.0233886	Staudt
MYELOMA_MS_SUBGROUP_DOWN	45	1.69701	0.0101215	0.0242511	Staudt
NFKB_UP_OCILY10_ONLY	18	1.68105	0.0140845	0.0270167	Staudt
E2F3_OVEREXPRESSION_2X_UP	131	1.67542	0	0.0274086	Staudt
TCELL_PIREP_CALCIUMDEFPTUP4X_FESKE_FIG4	27	1.67436	0.0232068	0.0266518	Staudt
IL6_LY10_UP_GROUP1	24	1.62537	0.0189873	0.037003	Staudt
B_CELL_UP_ANERGY	17	1.60349	0.0185567	0.042299	Staudt
NFKB_UP_BCR_PAPER	62	1.60083	0.0188285	0.0418792	Staudt
RETICULOCYTE_SMALL	19	1.59947	0.0294118	0.0411243	Staudt
QUIESCENCE_HEME_ALL	265	1.5989	0	0.0401837	Staudt
MYELOMA_LB_SUBGROUP_DOWN	45	1.59337	0.00603622	0.0408885	Staudt
GC_T_HELPER_UP_KIM	60	1.58303	0.0162933	0.0429602	Staudt
CC_1P33_UP	282	1.54668	0	0.0550644	Staudt
MYELOMA_HY_SUBGROUP_DOWN	45	1.54549	0.0302419	0.0542907	Staudt
FOLLICULAR_LYMPHOMA_IMMUNE_RESPONSE1	39	1.54296	0.0248447	0.0540959	Staudt
CC_1P5_UP	141	1.53381	0	0.0568131	Staudt
SERUM_RESPONSE_FB_UP	194	1.50501	0	0.0672223	Staudt
PMBL_HL_HIGH	68	1.49775	0.011976	0.069235	Staudt
MYC_CHIP_PET_EXPR_DOWN	254	1.49124	0	0.0706583	Staudt
TCELL_PIIND4X_FESKE_FIG4	88	1.48184	0.0167015	0.0739155	Staudt
BLIMP_PROLIFERATION_REPRESSED	88	1.47863	0.0277228	0.0741857	Staudt
NFKB_CHIPCHIP_YOUNG_ALL	336	1.47585	0.00204082	0.074018	Staudt
NFKB_CHIPCHIP_YOUNG_4FACTORS	37	1.46968	0.0496894	0.0753162	Staudt
MYD88_UP_HBL1	275	1.46558	0.004158	0.0758405	Staudt
KRAS_UP	83	1.45435	0.026749	0.0784854	Staudt
HRAS_OVEREXPRESSION_4X_UP	95	1.44532	0.0189474	0.0815343	Staudt
MYELOMA_CD-1_SUBGROUP_UP	46	1.44093	0.0470085	0.0822962	Staudt
CB_1P33_UP	177	1.43994	0.010101	0.081467	Staudt
HRAS_OVEREXPRESSION_2X_UP	182	1.42762	0.0121704	0.0858183	Staudt
MYELOMA_MS_SUBGROUP_UP	47	1.42514	0.046748	0.0843847	Staudt
TCELL_PIIND_CSADOWN4X	68	1.42293	0.0425101	0.0843653	Staudt

## Sheet: STAUDT_ETS1KD
NAME	SIZE	NES	NOM p-val	FDR q-val	Source
SREBP1A&2_UP_SCAP_DEP	33	-2.42192	0	0	Staudt
JAK_IL10_LY10_UP	38	-2.16826	0	0	Staudt
GLUTAMINE_STARVE_UP	281	-2.15438	0	0	Staudt
PLASMA_CELL_GT_B_CELL	337	-2.10297	0	0.000245833	Staudt
IRF4_MYELOMA_INDUCED_DIRECT	37	-1.95684	0	0.0036563	Staudt
IL10_OCILY3_UP	122	-1.91809	0	0.00459431	Staudt
STAT3HIGH_ABC_DLBCL_SUBGROUP	93	-1.83632	0.00201613	0.01281	Staudt
STAT3_UP_OCILY10	41	-1.83604	0.0020202	0.0112087	Staudt
GC_B_CELL_BL_EQUAL_DLBCL	216	-1.80539	0	0.014077	Staudt
XBP1_TARGET_ALL	74	-1.74735	0.00384615	0.0300337	Staudt
GC_B_CELL_U133PLUS	300	-1.69748	0	0.0446651	Staudt
IRF4_MYELOMA_INDUCED_ALL	293	-1.66172	0	0.0560759	Staudt
RAPAMYCIN_BJAB_DOWN	219	-1.66003	0	0.0522143	Staudt
TGFBETA_UP_EPITHELIAL_LARGE	47	-1.64408	0.00188679	0.0558016	Staudt
ERYTHROID_PRECURSOR_GNF	248	-1.64394	0	0.0520815	Staudt
GLUTAMINE_GLUCOSE_STARVE_BOTH_DOWN	414	-1.61661	0	0.0614716	Staudt
XBP1_TARGET_SECRETORY	49	-1.61593	0.0118343	0.0582891	Staudt
IL6_LY10_UP_ALL	38	-1.6071	0.0137795	0.0600038	Staudt
BLOOD_MODULE-1.8_UNDETERMINED	138	-1.58438	0.00195695	0.0677051	Staudt
DENDRITIC_CELL_CD123POS_TONSIL	29	-1.58101	0.0265655	0.0665129	Staudt
IRF4_MYELOMA_INDUCED_LYMPHOCHIP	121	-1.57397	0	0.0673824	Staudt
BCL6_CHIPSEQ_BASSO_ALL	4480	-1.57238	0	0.0654981	Staudt
BLOOD_MODULE-3.9_UNDETERMINED	236	-1.57227	0	0.0626895	Staudt
IRF4_TARGET_MM_PLASMA_CELL_GT_B_CELL	66	-1.57038	0.0139721	0.0613108	Staudt
IRF4_MYELOMA_INDUCED_AGILENT	184	-1.56118	0	0.062943	Staudt
MYELOMA_CD-1_SUBGROUP_DOWN	43	-1.55669	0.0158416	0.0629929	Staudt
JAK2_DOWNREGULATED_PMBL	417	-1.55556	0	0.0611386	Staudt
BCL6_CHIP-CHIP_ALL_CI	2875	-1.53495	0	0.0693209	Staudt
PI3K_OVEREXPRESSION_DOWN	57	-1.52809	0.0331492	0.0703526	Staudt
QUIESCENCE_HEME_CLUSTER2	77	-1.51494	0.00988142	0.0755146	Staudt
MYELOMA_TACI_LOW_PLASMABLAST_GENE	73	-1.50645	0.0226843	0.077895	Staudt
GC_T_HELPER_UP4X_CHTANOVA	169	-1.50001	0.00400802	0.0797962	Staudt
GLUCOSE_STARVE_DOWN	152	-1.48738	0.00575816	0.0857458	Staudt
BLOOD_MODULE-3.4_UNDETERMINED	285	-1.48684	0.00392157	0.0836728	Staudt
SERUM_RESPONSE_FB_DOWN	196	-1.48608	0	0.0817158	Staudt
SPLENIC_MARGINAL_ZONE_BCELL_GT_NAIVE_AND_GC_BCELL	22	-1.48497	0.0476191	0.0801915	Staudt
XBP1_TARGET_OTHER	25	-1.482	0.0462428	0.0798279	Staudt
CD40_DOWNREGULATED_BURKITT_LYMPHOMA	69	-1.47445	0.0292969	0.0823213	Staudt
THYMIC_DP_TCELL_GT_THYMIC_SP_CD4+TCELL	98	-1.45476	0.0190678	0.0899231	Staudt

## Sheet: MSigDB_CTR
NAME	SIZE	NES	NOM p-val	FDR q-val	Source
KEGG_DNA_REPLICATION	36	2.57652	0	0	MSigDB
KLEIN_PRIMARY_EFFUSION_LYMPHOMA_DN	57	2.56121	0	0	MSigDB
KAUFFMANN_MELANOMA_RELAPSE_UP	57	2.52135	0	0	MSigDB
REACTOME_DNA_STRAND_ELONGATION	29	2.50627	0	0	MSigDB
REACTOME_ACTIVATION_OF_THE_PRE_REPLICATIVE_COMPLEX	24	2.49204	0	0	MSigDB
REACTOME_G2_M_CHECKPOINTS	37	2.47653	0	0	MSigDB
ZHANG_TLX_TARGETS_60HR_DN	259	2.45295	0	0	MSigDB
REACTOME_ACTIVATION_OF_ATR_IN_RESPONSE_TO_REPLICATION_STRESS	31	2.42023	0	0	MSigDB
DUTERTRE_ESTRADIOL_RESPONSE_24HR_UP	309	2.41773	0	0	MSigDB
ZHANG_TLX_TARGETS_DN	84	2.3859	0	9.67312e-05	MSigDB
CROONQUIST_NRAS_SIGNALING_DN	71	2.37151	0	8.79374e-05	MSigDB
ZHOU_CELL_CYCLE_GENES_IN_IR_RESPONSE_6HR	80	2.35713	0	0.000161602	MSigDB
MARSON_FOXP3_TARGETS_UP	63	2.33009	0	0.000223612	MSigDB
KOBAYASHI_EGFR_SIGNALING_24HR_DN	239	2.31916	0	0.000276319	MSigDB
CROONQUIST_IL6_DEPRIVATION_DN	95	2.31501	0	0.000257898	MSigDB
ROSTY_CERVICAL_CANCER_PROLIFERATION_CLUSTER	137	2.30767	0	0.00024178	MSigDB
KONG_E2F3_TARGETS	96	2.30645	0	0.000283853	MSigDB
SMIRNOV_RESPONSE_TO_IR_6HR_DN	108	2.29876	0	0.000268083	MSigDB
QI_PLASMACYTOMA_UP	256	2.29228	0	0.000253973	MSigDB
REACTOME_EXTENSION_OF_TELOMERES	26	2.29019	0	0.000241275	MSigDB
BASSO_CD40_SIGNALING_UP	101	2.27707	0	0.000367016	MSigDB
ISHIDA_E2F_TARGETS	52	2.27047	0	0.000350334	MSigDB
PUJANA_XPRSS_INT_NETWORK	160	2.26554	0	0.000504179	MSigDB
ZHAN_EARLY_DIFFERENTIATION_GENES_DN	42	2.25961	0	0.000523651	MSigDB
LI_INDUCED_T_TO_NATURAL_KILLER_UP	290	2.23369	0	0.000735181	MSigDB
HALLMARK_E2F_TARGETS	189	2.23041	0	0.00074486	MSigDB
GOBERT_OLIGODENDROCYTE_DIFFERENTIATION_UP	523	2.23011	0	0.000717272	MSigDB
LIANG_HEMATOPOIESIS_STEM_CELL_NUMBER_LARGE_VS_TINY_UP	41	2.22992	0	0.000691656	MSigDB
RB_P107_DN.V1_UP	132	2.22754	0	0.000667805	MSigDB
REACTOME_LAGGING_STRAND_SYNTHESIS	19	2.22616	0	0.000645545	MSigDB
GRAHAM_NORMAL_QUIESCENT_VS_NORMAL_DIVIDING_DN	85	2.21059	0	0.000906596	MSigDB
SHIN_B_CELL_LYMPHOMA_CLUSTER_9	18	2.20585	0	0.00090839	MSigDB
HOFFMANN_PRE_BI_TO_LARGE_PRE_BII_LYMPHOCYTE_DN	72	2.20357	0	0.0009101	MSigDB
KUROZUMI_RESPONSE_TO_ONCOCYTIC_VIRUS	42	2.20343	0	0.000911456	MSigDB
LEE_DIFFERENTIATING_T_LYMPHOCYTE	181	2.20216	0	0.000885414	MSigDB
PUJANA_BRCA_CENTERED_NETWORK	114	2.17503	0	0.00150975	MSigDB
FLECHNER_BIOPSY_KIDNEY_TRANSPLANT_REJECTED_VS_OK_UP	85	2.17273	0	0.00157226	MSigDB
KANG_DOXORUBICIN_RESISTANCE_UP	53	2.17034	0	0.00160796	MSigDB
SIMBULAN_PARP1_TARGETS_DN	17	2.16189	0	0.00194247	MSigDB
VERNELL_RETINOBLASTOMA_PATHWAY_UP	68	2.15679	0	0.00205934	MSigDB
SMID_BREAST_CANCER_NORMAL_LIKE_UP	450	2.15226	0	0.00224492	MSigDB
IMMUNE_RESPONSE	234	2.15108	0	0.00223755	MSigDB
ZHOU_CELL_CYCLE_GENES_IN_IR_RESPONSE_24HR	120	2.14888	0	0.002275	MSigDB
KEGG_MISMATCH_REPAIR	23	2.14111	0	0.00253547	MSigDB
WALLACE_PROSTATE_CANCER_RACE_UP	277	2.13993	0	0.00258693	MSigDB
BURTON_ADIPOGENESIS_3	98	2.12574	0	0.00303602	MSigDB
KAMMINGA_EZH2_TARGETS	41	2.12215	0	0.00303292	MSigDB
PASQUALUCCI_LYMPHOMA_BY_GC_STAGE_DN	159	2.11647	0	0.0032321	MSigDB
SARRIO_EPITHELIAL_MESENCHYMAL_TRANSITION_UP	165	2.11145	0	0.00356411	MSigDB
IMMUNE_SYSTEM_PROCESS	327	2.10637	0	0.00386163	MSigDB
HOFFMANN_SMALL_PRE_BII_TO_IMMATURE_B_LYMPHOCYTE_UP	69	2.10594	0	0.00380482	MSigDB
RUIZ_TNC_TARGETS_DN	136	2.10564	0	0.00375001	MSigDB
BOYLAN_MULTIPLE_MYELOMA_C_UP	44	2.10551	0	0.00369784	MSigDB
WANG_RESPONSE_TO_GSK3_INHIBITOR_SB216763_DN	343	2.0996	0	0.00389763	MSigDB
MORI_LARGE_PRE_BII_LYMPHOCYTE_DN	57	2.09268	0	0.00410949	MSigDB
STEIN_ESRRA_TARGETS_RESPONSIVE_TO_ESTROGEN_DN	41	2.08984	0	0.00419207	MSigDB
BURTON_ADIPOGENESIS_PEAK_AT_16HR	40	2.08339	0	0.00450989	MSigDB
PYEON_HPV_POSITIVE_TUMORS_UP	81	2.07306	0	0.00525151	MSigDB
TARTE_PLASMA_CELL_VS_B_LYMPHOCYTE_DN	37	2.06388	0	0.00590258	MSigDB
PID_BCR_5PATHWAY	65	2.06	0	0.00599667	MSigDB
HALLMARK_ALLOGRAFT_REJECTION	200	2.05829	0	0.00605728	MSigDB
POSITIVE_REGULATION_OF_CELL_DIFFERENTIATION	25	2.05493	0	0.00639763	MSigDB
DIRMEIER_LMP1_RESPONSE_EARLY	66	2.04669	0	0.00704929	MSigDB
T_CELL_ACTIVATION	44	2.04632	0	0.00698513	MSigDB
KUUSELO_PANCREATIC_CANCER_19Q13_AMPLIFICATION	30	2.03365	0	0.00810215	MSigDB
REACTOME_IMMUNOREGULATORY_INTERACTIONS_BETWEEN_A_LYMPHOID_AND_A_NON_LYMPHOID_CELL	67	2.03137	0	0.00825966	MSigDB
REACTOME_PROCESSIVE_SYNTHESIS_ON_THE_LAGGING_STRAND	15	2.02248	0	0.00906236	MSigDB
KAUFFMANN_DNA_REPLICATION_GENES	137	2.0182	0	0.00944338	MSigDB
PID_AURORA_B_PATHWAY	39	2.01033	0	0.0101515	MSigDB
REACTOME_S_PHASE	101	2.00981	0	0.0101029	MSigDB
BIOCARTA_ATRBRCA_PATHWAY	21	2.00308	0.002	0.010862	MSigDB
REACTOME_BASE_EXCISION_REPAIR	19	2.00274	0	0.0107382	MSigDB
REACTOME_DNA_REPLICATION	183	2.00085	0	0.0107637	MSigDB
KEGG_ASTHMA	30	1.99602	0.00196464	0.0112724	MSigDB
EINAV_INTERFERON_SIGNATURE_IN_CANCER	27	1.99466	0	0.0112772	MSigDB
GENTLES_LEUKEMIC_STEM_CELL_UP	28	1.99153	0	0.0116791	MSigDB
POOLA_INVASIVE_BREAST_CANCER_UP	272	1.99085	0	0.0116283	MSigDB
WALLACE_JAK2_TARGETS_UP	24	1.98514	0	0.0121631	MSigDB
LABBE_WNT3A_TARGETS_UP	111	1.985	0	0.0120217	MSigDB
ZHAN_MULTIPLE_MYELOMA_PR_UP	44	1.98032	0	0.0126119	MSigDB
YU_MYC_TARGETS_DN	53	1.97371	0	0.0132706	MSigDB
WHITFIELD_CELL_CYCLE_G1_S	128	1.95961	0	0.0156384	MSigDB
DANG_MYC_TARGETS_DN	31	1.95947	0	0.0154616	MSigDB
VALK_AML_CLUSTER_1	25	1.95739	0	0.0157394	MSigDB
XU_AKT1_TARGETS_6HR	26	1.95443	0.00209205	0.0161133	MSigDB
PID_BARD1_PATHWAY	29	1.95302	0.00210084	0.0161867	MSigDB
RODWELL_AGING_KIDNEY_UP	443	1.94958	0	0.0166464	MSigDB
HAN_JNK_SINGALING_UP	35	1.94454	0	0.0172273	MSigDB
MORI_MATURE_B_LYMPHOCYTE_UP	87	1.94141	0	0.0176855	MSigDB
LE_EGR2_TARGETS_UP	105	1.93985	0	0.0177159	MSigDB
IMMUNE_SYSTEM_DEVELOPMENT	79	1.9374	0	0.0179164	MSigDB
WIERENGA_STAT5A_TARGETS_DN	192	1.93493	0	0.0181542	MSigDB
CROMER_TUMORIGENESIS_UP	61	1.92949	0	0.018908	MSigDB
JOHANSSON_GLIOMAGENESIS_BY_PDGFB_UP	53	1.92816	0	0.018955	MSigDB
HENDRICKS_SMARCA4_TARGETS_DN	49	1.92653	0.00207469	0.0190407	MSigDB
REGULATION_OF_T_CELL_ACTIVATION	28	1.92583	0.00209205	0.0190237	MSigDB
CHANG_CYCLING_GENES	138	1.92422	0	0.0192978	MSigDB
PUJANA_BRCA2_PCC_NETWORK	407	1.92318	0	0.0193771	MSigDB
LYMPHOCYTE_ACTIVATION	61	1.92124	0.00208333	0.0195615	MSigDB
CHIARETTI_T_ALL_RELAPSE_PROGNOSIS	19	1.91689	0	0.0203367	MSigDB
REACTOME_SYNTHESIS_OF_DNA	84	1.91406	0	0.0207292	MSigDB
BERENJENO_ROCK_SIGNALING_NOT_VIA_RHOA_UP	29	1.91177	0.00204499	0.0210026	MSigDB
GRAHAM_CML_DIVIDING_VS_NORMAL_QUIESCENT_UP	177	1.8988	0	0.0237184	MSigDB
FINETTI_BREAST_CANCER_KINOME_RED	15	1.89754	0.00201613	0.0237505	MSigDB
KIM_LRRC3B_TARGETS	30	1.89427	0.00203666	0.0243913	MSigDB
PUJANA_BREAST_CANCER_WITH_BRCA1_MUTATED_UP	52	1.88939	0.00193798	0.0253316	MSigDB
FERREIRA_EWINGS_SARCOMA_UNSTABLE_VS_STABLE_UP	158	1.88766	0	0.0255128	MSigDB
FUJII_YBX1_TARGETS_DN	200	1.88568	0	0.0258595	MSigDB
FUKUSHIMA_TNFSF11_TARGETS	16	1.88516	0.00452489	0.0257737	MSigDB
OUYANG_PROSTATE_CANCER_MARKERS	19	1.88258	0.00604839	0.0262115	MSigDB
REACTOME_G1_S_TRANSITION	102	1.88257	0	0.0259753	MSigDB
KEGG_BASE_EXCISION_REPAIR	33	1.8805	0	0.0262545	MSigDB
WU_APOPTOSIS_BY_CDKN1A_VIA_TP53	52	1.87955	0.002	0.0262443	MSigDB
ATF2_UP.V1_UP	181	1.87672	0	0.0267014	MSigDB
SU_THYMUS	20	1.87447	0.00422833	0.0270005	MSigDB
LEUKOCYTE_ACTIVATION	68	1.87349	0	0.0269684	MSigDB
WHITEFORD_PEDIATRIC_CANCER_MARKERS	113	1.87071	0	0.0275262	MSigDB
WHITFIELD_CELL_CYCLE_G2	165	1.86852	0	0.0278437	MSigDB
WINNEPENNINCKX_MELANOMA_METASTASIS_UP	148	1.86697	0	0.0279683	MSigDB
SONG_TARGETS_OF_IE86_CMV_PROTEIN	58	1.86356	0.00204082	0.0285844	MSigDB
PID_ATR_PATHWAY	39	1.86348	0	0.0283719	MSigDB
TONKS_TARGETS_OF_RUNX1_RUNX1T1_FUSION_HSC_DN	182	1.85757	0	0.0299071	MSigDB
REACTOME_CELL_CYCLE_MITOTIC	304	1.85329	0	0.0310616	MSigDB
CHIANG_LIVER_CANCER_SUBCLASS_INTERFERON_UP	26	1.85298	0.00397614	0.0308733	MSigDB
GOLDRATH_ANTIGEN_RESPONSE	335	1.85242	0	0.0308123	MSigDB
BLUM_RESPONSE_TO_SALIRASIB_DN	326	1.84968	0	0.0313144	MSigDB
ODONNELL_TARGETS_OF_MYC_AND_TFRC_DN	43	1.84953	0	0.0310985	MSigDB
HEMOPOIETIC_OR_LYMPHOID_ORGAN_DEVELOPMENT	75	1.84634	0	0.0316337	MSigDB
LI_INDUCED_T_TO_NATURAL_KILLER_DN	112	1.84439	0	0.0319591	MSigDB
KAUFFMANN_DNA_REPAIR_GENES	220	1.84218	0	0.0324529	MSigDB
VERHAAK_AML_WITH_NPM1_MUTATED_DN	236	1.83895	0	0.0332764	MSigDB
REN_BOUND_BY_E2F	59	1.83823	0	0.033281	MSigDB
REACTOME_PD1_SIGNALING	18	1.83786	0.0100806	0.0331629	MSigDB
REACTOME_DNA_REPAIR	109	1.83699	0	0.0332262	MSigDB
REACTOME_E2F_MEDIATED_REGULATION_OF_DNA_REPLICATION	26	1.83638	0.00814664	0.0331171	MSigDB
MORI_IMMATURE_B_LYMPHOCYTE_DN	87	1.83608	0	0.0329803	MSigDB
DIRMEIER_LMP1_RESPONSE_LATE_DN	31	1.83469	0.00218818	0.0332932	MSigDB
REACTOME_GENERATION_OF_SECOND_MESSENGER_MOLECULES	27	1.82806	0.00595238	0.0350338	MSigDB
REACTOME_MITOTIC_M_M_G1_PHASES	163	1.82553	0	0.0356321	MSigDB
BENPORATH_PROLIFERATION	137	1.8214	0	0.0369193	MSigDB
B_CELL_ACTIVATION	20	1.81935	0.0040404	0.0375041	MSigDB
XU_CREBBP_TARGETS_DN	43	1.81851	0.00612245	0.037513	MSigDB
LEE_EARLY_T_LYMPHOCYTE_DN	55	1.81606	0	0.0380311	MSigDB
DAUER_STAT3_TARGETS_DN	48	1.81554	0	0.0379011	MSigDB
BOYAULT_LIVER_CANCER_SUBCLASS_G123_UP	44	1.81533	0	0.0377133	MSigDB
REACTOME_RESOLUTION_OF_AP_SITES_VIA_THE_MULTIPLE_NUCLEOTIDE_PATCH_REPLACEMENT_PATHWAY	17	1.8153	0.00411523	0.0374618	MSigDB
GAURNIER_PSMD4_TARGETS	73	1.81519	0	0.0372403	MSigDB
BAUS_TFF2_TARGETS_UP	30	1.81281	0.00202429	0.0377348	MSigDB
SASAKI_ADULT_T_CELL_LEUKEMIA	170	1.812	0	0.0378275	MSigDB
REGULATION_OF_MYELOID_CELL_DIFFERENTIATION	19	1.81144	0.00811359	0.0377688	MSigDB
HEMOPOIESIS	73	1.81087	0	0.0377502	MSigDB
REACTOME_GLOBAL_GENOMIC_NER_GG_NER	35	1.80999	0.00622407	0.0378199	MSigDB
ZEMBUTSU_SENSITIVITY_TO_VINCRISTINE	18	1.80957	0.00617284	0.0377248	MSigDB
REACTOME_SIGNALING_BY_FGFR1_FUSION_MUTANTS	18	1.80853	0.00394477	0.0377891	MSigDB
DNA_INTEGRITY_CHECKPOINT	23	1.80689	0.00404858	0.0382271	MSigDB
REACTOME_MITOTIC_G1_G1_S_PHASES	126	1.8068	0	0.0380006	MSigDB
REACTOME_FANCONI_ANEMIA_PATHWAY	22	1.80589	0.00785855	0.0381102	MSigDB
EGUCHI_CELL_CYCLE_RB1_TARGETS	23	1.80552	0.0059761	0.0379859	MSigDB
HOSHIDA_LIVER_CANCER_SUBCLASS_S1	232	1.80483	0	0.0379172	MSigDB
REGULATION_OF_CELL_DIFFERENTIATION	60	1.80307	0.00394477	0.0383228	MSigDB
TONKS_TARGETS_OF_RUNX1_RUNX1T1_FUSION_MONOCYTE_DN	53	1.8	0.00424628	0.0390898	MSigDB
TIAN_TNF_SIGNALING_VIA_NFKB	28	1.79986	0.00411523	0.0389085	MSigDB
ZHAN_MULTIPLE_MYELOMA_SPIKED	20	1.79793	0.00392157	0.0392818	MSigDB
STREICHER_LSM1_TARGETS_DN	19	1.79585	0.010352	0.0397356	MSigDB
GARGALOVIC_RESPONSE_TO_OXIDIZED_PHOSPHOLIPIDS_TURQUOISE_DN	50	1.79372	0.00210084	0.0401174	MSigDB
FOURNIER_ACINAR_DEVELOPMENT_LATE_2	263	1.79344	0	0.0399748	MSigDB
SOTIRIOU_BREAST_CANCER_GRADE_1_VS_3_UP	143	1.79232	0	0.0401706	MSigDB
REGULATION_OF_IMMUNE_SYSTEM_PROCESS	67	1.7909	0	0.0404691	MSigDB
KORKOLA_CORRELATED_WITH_POU5F1	30	1.79071	0.00808081	0.040304	MSigDB
ZHAN_MULTIPLE_MYELOMA_MS_DN	42	1.78748	0	0.0411615	MSigDB
SMID_BREAST_CANCER_LUMINAL_B_DN	535	1.787	0	0.0411299	MSigDB
MATTHEWS_SKIN_CARCINOGENESIS_VIA_JUN	15	1.78664	0.00612245	0.0410032	MSigDB
HUMORAL_IMMUNE_RESPONSE	32	1.78653	0.0043384	0.0407998	MSigDB
SIG_CD40PATHWAYMAP	33	1.7849	0.00201207	0.0412407	MSigDB
YU_MYC_TARGETS_UP	41	1.78394	0.0131868	0.0413709	MSigDB
REGULATION_OF_LYMPHOCYTE_ACTIVATION	35	1.78388	0.00397614	0.0411469	MSigDB
OXFORD_RALA_OR_RALB_TARGETS_UP	47	1.78164	0	0.0417366	MSigDB
GUTIERREZ_CHRONIC_LYMPHOCYTIC_LEUKEMIA_DN	52	1.77972	0	0.0421603	MSigDB
JAATINEN_HEMATOPOIETIC_STEM_CELL_DN	213	1.77675	0	0.0429164	MSigDB
WINNEPENNINCKX_MELANOMA_METASTASIS_DN	43	1.77644	0.00202429	0.0427858	MSigDB
GARCIA_TARGETS_OF_FLI1_AND_DAX1_DN	165	1.77433	0	0.0432617	MSigDB
VILIMAS_NOTCH1_TARGETS_UP	52	1.77418	0.0039604	0.0430721	MSigDB
ZHENG_GLIOBLASTOMA_PLASTICITY_UP	243	1.77367	0	0.0429857	MSigDB
WINTER_HYPOXIA_DN	46	1.77185	0.00831601	0.0435103	MSigDB
BOWIE_RESPONSE_TO_TAMOXIFEN	18	1.76916	0.0139721	0.0443917	MSigDB
CHEOK_RESPONSE_TO_MERCAPTOPURINE_DN	21	1.76839	0.0120482	0.0444918	MSigDB
ZHANG_TLX_TARGETS_36HR_DN	174	1.76478	0	0.0454772	MSigDB
FOURNIER_ACINAR_DEVELOPMENT_LATE_DN	21	1.76391	0.0145228	0.0455497	MSigDB
OXFORD_RALA_OR_RALB_TARGETS_DN	24	1.76363	0.0120724	0.0454013	MSigDB
VANASSE_BCL2_TARGETS_DN	70	1.76224	0	0.0456987	MSigDB
KIM_TIAL1_TARGETS	32	1.76131	0.00796813	0.0457986	MSigDB
AMIT_SERUM_RESPONSE_20_MCF10A	21	1.76065	0.00835073	0.0457821	MSigDB
LIN_APC_TARGETS	74	1.7584	0	0.0464744	MSigDB
REACTOME_SEMA4D_IN_SEMAPHORIN_SIGNALING	28	1.75691	0.00613497	0.0468495	MSigDB
PID_FANCONI_PATHWAY	44	1.75609	0	0.0469222	MSigDB
REACTOME_MITOTIC_PROMETAPHASE	86	1.75441	0	0.0473453	MSigDB
SHETH_LIVER_CANCER_VS_TXNIP_LOSS_PAM2	148	1.7529	0	0.0476788	MSigDB
FERRANDO_T_ALL_WITH_MLL_ENL_FUSION_DN	85	1.74982	0.00201207	0.0487016	MSigDB
FRASOR_RESPONSE_TO_SERM_OR_FULVESTRANT_DN	49	1.74977	0.00404858	0.0484664	MSigDB
NOJIMA_SFRP2_TARGETS_UP	31	1.74944	0.00398406	0.0483597	MSigDB
BORCZUK_MALIGNANT_MESOTHELIOMA_DN	94	1.74823	0.00189394	0.0486593	MSigDB
T_CELL_DIFFERENTIATION	15	1.74815	0.00198413	0.0484521	MSigDB
HUI_MAPK14_TARGETS_UP	20	1.74731	0.00578035	0.0485101	MSigDB
CHICAS_RB1_TARGETS_SENESCENT	533	1.74573	0	0.0489106	MSigDB
ACTIVATION_OF_NF_KAPPAB_TRANSCRIPTION_FACTOR	18	1.74561	0.00194932	0.0487335	MSigDB
VECCHI_GASTRIC_CANCER_EARLY_UP	400	1.74182	0	0.0499658	MSigDB
HAMAI_APOPTOSIS_VIA_TRAIL_DN	180	1.74172	0	0.0497525	MSigDB
SHETH_LIVER_CANCER_VS_TXNIP_LOSS_PAM3	69	1.74083	0.00204082	0.0499108	MSigDB
MIKKELSEN_MCV6_ICP_WITH_H3K27ME3	71	1.73574	0.00567108	0.0518105	MSigDB
SEKI_INFLAMMATORY_RESPONSE_LPS_UP	74	1.73248	0.002079	0.0529259	MSigDB
CAIRO_PML_TARGETS_BOUND_BY_MYC_UP	23	1.73207	0.00621118	0.0528354	MSigDB
AMUNDSON_POOR_SURVIVAL_AFTER_GAMMA_RADIATION_8G	92	1.73033	0	0.0533143	MSigDB
PID_FOXM1_PATHWAY	39	1.72881	0.00592885	0.0536113	MSigDB
KEGG_ALLOGRAFT_REJECTION	38	1.72792	0.00213675	0.0537051	MSigDB
BIOCARTA_KERATINOCYTE_PATHWAY	46	1.72761	0.00414079	0.0536091	MSigDB
WANG_TARGETS_OF_MLL_CBP_FUSION_UP	43	1.7262	0.0040404	0.0539273	MSigDB
LINDGREN_BLADDER_CANCER_CLUSTER_2B	378	1.72174	0	0.0556468	MSigDB
WAKASUGI_HAVE_ZNF143_BINDING_SITES	58	1.72029	0.00404858	0.0559965	MSigDB
HOFFMANN_LARGE_TO_SMALL_PRE_BII_LYMPHOCYTE_UP	158	1.72007	0	0.0558386	MSigDB
AKL_HTLV1_INFECTION_UP	25	1.71861	0.00389864	0.0562985	MSigDB
SA_MMP_CYTOKINE_CONNECTION	15	1.71732	0.0187891	0.0566351	MSigDB
BAELDE_DIABETIC_NEPHROPATHY_UP	85	1.71395	0	0.0580477	MSigDB
BASAKI_YBX1_TARGETS_UP	273	1.71291	0	0.0581876	MSigDB
MEIOSIS_I	17	1.70957	0.0137255	0.0594478	MSigDB
SHIN_B_CELL_LYMPHOMA_CLUSTER_3	28	1.70829	0.0123711	0.0597798	MSigDB
DEMAGALHAES_AGING_UP	55	1.7075	0	0.0598422	MSigDB
HOMEOSTASIS_OF_NUMBER_OF_CELLS	20	1.70491	0.0168776	0.0608393	MSigDB
LINDGREN_BLADDER_CANCER_CLUSTER_1_DN	362	1.70372	0	0.0612962	MSigDB
BIDUS_METASTASIS_DN	149	1.70088	0	0.0625489	MSigDB
ICHIBA_GRAFT_VERSUS_HOST_DISEASE_35D_UP	131	1.69793	0	0.0638842	MSigDB
REACTOME_G1_S_SPECIFIC_TRANSCRIPTION	15	1.69793	0.012605	0.0636076	MSigDB
NAKAYAMA_FRA2_TARGETS	42	1.69752	0.0124481	0.063521	MSigDB
PETROVA_ENDOTHELIUM_LYMPHATIC_VS_BLOOD_UP	129	1.69243	0	0.0656537	MSigDB
CHEN_METABOLIC_SYNDROM_NETWORK	1143	1.69202	0	0.0655305	MSigDB
TAVOR_CEBPA_TARGETS_DN	30	1.69022	0.0192719	0.0662179	MSigDB
BASSO_B_LYMPHOCYTE_NETWORK	137	1.68948	0.00233645	0.0663532	MSigDB
RADAEVA_RESPONSE_TO_IFNA1_UP	52	1.68797	0.00589391	0.0669561	MSigDB
RAY_TARGETS_OF_P210_BCR_ABL_FUSION_DN	16	1.68765	0.0198807	0.0668544	MSigDB
PARK_HSC_VS_MULTIPOTENT_PROGENITORS_DN	17	1.68624	0.0153846	0.0674104	MSigDB
CHIARADONNA_NEOPLASTIC_TRANSFORMATION_KRAS_CDC25_UP	56	1.68581	0.00619835	0.0673632	MSigDB
REACTOME_SIGNALING_BY_FGFR1_MUTANTS	29	1.68183	0.0123203	0.069322	MSigDB
PANGAS_TUMOR_SUPPRESSION_BY_SMAD1_AND_SMAD5_UP	125	1.67577	0.002079	0.0722339	MSigDB
REACTOME_CELL_CYCLE	395	1.67483	0	0.0723608	MSigDB
BOYLAN_MULTIPLE_MYELOMA_C_CLUSTER_UP	36	1.67268	0.00583658	0.0733665	MSigDB
DUNNE_TARGETS_OF_AML1_MTG8_FUSION_UP	48	1.67228	0.00201207	0.0732731	MSigDB
CHIANG_LIVER_CANCER_SUBCLASS_PROLIFERATION_UP	167	1.67223	0	0.0730069	MSigDB
LEF1_UP.V1_UP	189	1.67152	0	0.0731512	MSigDB
BASE_EXCISION_REPAIR	16	1.67094	0.0201613	0.0732122	MSigDB
MCLACHLAN_DENTAL_CARIES_DN	233	1.66997	0	0.073553	MSigDB
CELL_ACTIVATION	75	1.66928	0.00204499	0.0736597	MSigDB
BIOCARTA_G2_PATHWAY	23	1.66764	0.0217865	0.0743452	MSigDB
CHARAFE_BREAST_CANCER_LUMINAL_VS_MESENCHYMAL_DN	445	1.66755	0	0.0740961	MSigDB
LE_NEURONAL_DIFFERENTIATION_DN	19	1.66461	0.0127119	0.0754097	MSigDB
REACTOME_NEGATIVE_REGULATORS_OF_RIG_I_MDA5_SIGNALING	29	1.66266	0.00798403	0.0762302	MSigDB
KEGG_TYPE_I_DIABETES_MELLITUS	44	1.6616	0.0102041	0.0765624	MSigDB
AMIT_EGF_RESPONSE_480_MCF10A	42	1.65996	0.00587084	0.0773543	MSigDB
KEGG_DORSO_VENTRAL_AXIS_FORMATION	25	1.65958	0.0166667	0.0773285	MSigDB
HALLMARK_G2M_CHECKPOINT	190	1.65741	0	0.0784077	MSigDB
ALCALAY_AML_BY_NPM1_LOCALIZATION_DN	181	1.65705	0.00199601	0.078292	MSigDB
REACTOME_NUCLEOTIDE_BINDING_DOMAIN_LEUCINE_RICH_REPEAT_CONTAINING_RECEPTOR_NLR_SIGNALING_PATHWAYS	43	1.65653	0.012605	0.0783537	MSigDB
PID_CD8_TCR_PATHWAY	53	1.65649	0.00387597	0.078072	MSigDB
LEE_TARGETS_OF_PTCH1_AND_SUFU_UP	51	1.65494	0.00847458	0.0787363	MSigDB
IWANAGA_E2F1_TARGETS_INDUCED_BY_SERUM	28	1.65366	0.00811359	0.0792279	MSigDB
REACTOME_CELL_CYCLE_CHECKPOINTS	112	1.65349	0.00431035	0.0790199	MSigDB
FEVR_CTNNB1_TARGETS_DN	512	1.65238	0	0.0794314	MSigDB
HALLMARK_INTERFERON_ALPHA_RESPONSE	96	1.65094	0.0100806	0.0799802	MSigDB
PYEON_CANCER_HEAD_AND_NECK_VS_CERVICAL_UP	169	1.65059	0	0.079899	MSigDB
BENPORATH_ES_2	34	1.6503	0.018	0.0797205	MSigDB
LYMPHOCYTE_DIFFERENTIATION	26	1.6499	0.00847458	0.079702	MSigDB
MORI_LARGE_PRE_BII_LYMPHOCYTE_UP	83	1.64874	0.00414938	0.0800649	MSigDB
LEE_LIVER_CANCER_MYC_TGFA_UP	60	1.64795	0.0039604	0.0802596	MSigDB
THEILGAARD_NEUTROPHIL_AT_SKIN_WOUND_DN	219	1.64782	0	0.0800611	MSigDB
LEE_LIVER_CANCER_HEPATOBLAST	16	1.64739	0.021611	0.0799814	MSigDB
BIOCARTA_IL17_PATHWAY	15	1.64669	0.0210526	0.0800819	MSigDB
REACTOME_TCR_SIGNALING	52	1.64351	0.0100402	0.0816653	MSigDB
BIOCARTA_MPR_PATHWAY	33	1.64288	0.0078125	0.0817272	MSigDB
KEGG_LEISHMANIA_INFECTION	70	1.64181	0.00782779	0.082052	MSigDB
PID_IL27_PATHWAY	26	1.6411	0.0158103	0.0822596	MSigDB
GAVIN_FOXP3_TARGETS_CLUSTER_P6	87	1.6356	0.00821355	0.0853848	MSigDB
MANALO_HYPOXIA_DN	271	1.63497	0	0.0855196	MSigDB
RESPONSE_TO_DNA_DAMAGE_STIMULUS	158	1.63451	0.00200803	0.0855431	MSigDB
WANG_BARRETTS_ESOPHAGUS_AND_ESOPHAGUS_CANCER_UP	26	1.63424	0.0165975	0.0854147	MSigDB
SHIN_B_CELL_LYMPHOMA_CLUSTER_5	17	1.63288	0.0141988	0.0859841	MSigDB
DNA_DAMAGE_RESPONSESIGNAL_TRANSDUCTION	34	1.63217	0.00852879	0.0861011	MSigDB
GRAHAM_CML_QUIESCENT_VS_NORMAL_QUIESCENT_DN	47	1.63173	0.0118343	0.086064	MSigDB
DNA_REPLICATION	94	1.63145	0.00204918	0.0859428	MSigDB
WIERENGA_STAT5A_TARGETS_GROUP2	56	1.62877	0.00604839	0.0873662	MSigDB
REACTOME_PYRIMIDINE_METABOLISM	24	1.62808	0.019305	0.0875656	MSigDB
REACTOME_ACTIVATED_TAK1_MEDIATES_P38_MAPK_ACTIVATION	15	1.62772	0.0247423	0.0875216	MSigDB
KRAS.LUNG.BREAST_UP.V1_UP	137	1.62761	0	0.0872966	MSigDB
VANDESLUIS_COMMD1_TARGETS_GROUP_4_UP	19	1.62718	0.0189474	0.0872728	MSigDB
NEWMAN_ERCC6_TARGETS_UP	25	1.62632	0.0165289	0.0874717	MSigDB
REACTOME_NOD1_2_SIGNALING_PATHWAY	27	1.62622	0.0168776	0.0872329	MSigDB
REACTOME_SEMA4D_INDUCED_CELL_MIGRATION_AND_GROWTH_CONE_COLLAPSE	24	1.62448	0.0206186	0.0881748	MSigDB
PIONTEK_PKD1_TARGETS_UP	37	1.62405	0.0135397	0.0881558	MSigDB
SHIPP_DLBCL_VS_FOLLICULAR_LYMPHOMA_DN	43	1.62354	0.0211538	0.0882451	MSigDB
RASHI_RESPONSE_TO_IONIZING_RADIATION_6	79	1.62334	0.0083682	0.088056	MSigDB
CHEN_ETV5_TARGETS_TESTIS	23	1.62055	0.0282828	0.0896106	MSigDB
MULLIGHAN_NPM1_MUTATED_SIGNATURE_2_DN	73	1.61989	0.00796813	0.0897717	MSigDB
PID_RHOA_REG_PATHWAY	44	1.6195	0.0116959	0.089725	MSigDB
BIOCARTA_ETS_PATHWAY	18	1.61857	0.026	0.0900449	MSigDB
DORMOY_ELAVL1_TARGETS	16	1.61451	0.0383065	0.0923709	MSigDB
BENNETT_SYSTEMIC_LUPUS_ERYTHEMATOSUS	31	1.6126	0.0204918	0.0934005	MSigDB
CHICAS_RB1_TARGETS_LOW_SERUM	85	1.61256	0.00612245	0.0931189	MSigDB
BIOCARTA_PML_PATHWAY	17	1.61206	0.0248447	0.0932295	MSigDB
ROZANOV_MMP14_TARGETS_DN	34	1.6085	0.012685	0.0954674	MSigDB
GRAHAM_CML_QUIESCENT_VS_NORMAL_QUIESCENT_UP	84	1.60757	0.00610998	0.0958201	MSigDB
PID_ANGIOPOIETIN_RECEPTOR_PATHWAY	50	1.60714	0.0123457	0.0958453	MSigDB
AFFAR_YY1_TARGETS_DN	230	1.60645	0	0.0960443	MSigDB
BILD_E2F3_ONCOGENIC_SIGNATURE	221	1.60573	0.00414938	0.0961854	MSigDB
SHEDDEN_LUNG_CANCER_POOR_SURVIVAL_A6	433	1.60457	0	0.0967612	MSigDB
PID_FAK_PATHWAY	58	1.60431	0.00589391	0.0966312	MSigDB
WANG_NFKB_TARGETS	24	1.60296	0.0159363	0.0972185	MSigDB
SERVITJA_ISLET_HNF1A_TARGETS_UP	162	1.60261	0	0.0971872	MSigDB
MOREIRA_RESPONSE_TO_TSA_UP	28	1.60067	0.0147679	0.0983337	MSigDB
LINDSTEDT_DENDRITIC_CELL_MATURATION_D	68	1.60057	0.00578035	0.0981456	MSigDB
ENK_UV_RESPONSE_EPIDERMIS_UP	279	1.59808	0	0.0994901	MSigDB
BRACHAT_RESPONSE_TO_METHOTREXATE_DN	25	1.59783	0.0198807	0.0993388	MSigDB
MISSIAGLIA_REGULATED_BY_METHYLATION_DN	114	1.59716	0.00410678	0.0995011	MSigDB

## Sheet: MSigDB_ETS1KD
NAME	SIZE	NES	NOM p-val	FDR q-val	Source
REACTOME_PACKAGING_OF_TELOMERE_ENDS	48	-2.32127	0	0.0010404	MSigDB
REACTOME_RNA_POL_I_PROMOTER_OPENING	59	-2.20762	0	0.00412462	MSigDB
TERAO_AOX4_TARGETS_HG_UP	26	-2.18771	0	0.00514861	MSigDB
TARTE_PLASMA_CELL_VS_B_LYMPHOCYTE_UP	75	-2.11055	0	0.0159437	MSigDB
REACTOME_CHOLESTEROL_BIOSYNTHESIS	23	-2.10672	0	0.0133633	MSigDB
MARTINEZ_RESPONSE_TO_TRABECTEDIN	50	-2.09771	0	0.0125099	MSigDB
REACTOME_RNA_POL_I_TRANSCRIPTION	86	-2.08903	0	0.0119007	MSigDB
SHAFFER_IRF4_MULTIPLE_MYELOMA_PROGRAM	35	-2.03486	0.00200803	0.0275245	MSigDB
HORTON_SREBF_TARGETS	25	-2.00814	0	0.0354259	MSigDB
KEGG_VASOPRESSIN_REGULATED_WATER_REABSORPTION	44	-2.00454	0	0.0331209	MSigDB
ZHANG_TLX_TARGETS_UP	106	-1.98414	0	0.0405933	MSigDB
SCHMIDT_POR_TARGETS_IN_LIMB_BUD_UP	25	-1.97642	0	0.0413384	MSigDB
KEGG_TERPENOID_BACKBONE_BIOSYNTHESIS	15	-1.97568	0	0.0383964	MSigDB
GARGALOVIC_RESPONSE_TO_OXIDIZED_PHOSPHOLIPIDS_GREEN_UP	23	-1.96276	0	0.0429948	MSigDB
PARK_HSC_VS_MULTIPOTENT_PROGENITORS_UP	18	-1.95262	0.00562852	0.0466356	MSigDB
ZHAN_LATE_DIFFERENTIATION_GENES_UP	32	-1.9522	0	0.044042	MSigDB
GALLUZZI_PERMEABILIZE_MITOCHONDRIA	43	-1.94349	0	0.0460622	MSigDB
HAHTOLA_MYCOSIS_FUNGOIDES_UP	19	-1.94227	0.00194553	0.0441357	MSigDB
REACTOME_AMYLOIDS	80	-1.94101	0	0.0425185	MSigDB
AKL_HTLV1_INFECTION_DN	64	-1.94008	0	0.0411107	MSigDB
ZHAN_MULTIPLE_MYELOMA_CD1_VS_CD2_DN	50	-1.93477	0.00187266	0.0419512	MSigDB
SAGIV_CD24_TARGETS_DN	46	-1.93355	0	0.0403748	MSigDB
DACOSTA_UV_RESPONSE_VIA_ERCC3_DN	818	-1.93288	0	0.0388442	MSigDB
VERHAAK_AML_WITH_NPM1_MUTATED_UP	180	-1.92845	0	0.0390271	MSigDB
MA_MYELOID_DIFFERENTIATION_UP	39	-1.92831	0	0.037466	MSigDB
PID_IGF1_PATHWAY	30	-1.92818	0	0.036025	MSigDB
REACTOME_MEIOTIC_RECOMBINATION	83	-1.92211	0	0.0377453	MSigDB
DAVICIONI_MOLECULAR_ARMS_VS_ERMS_UP	313	-1.92001	0	0.0373515	MSigDB
HASLINGER_B_CLL_WITH_6Q21_DELETION	19	-1.91949	0	0.0363118	MSigDB
KEGG_NITROGEN_METABOLISM	23	-1.91119	0.00189753	0.0394532	MSigDB
PELLICCIOTTA_HDAC_IN_ANTIGEN_PRESENTATION_UP	64	-1.911	0	0.0382794	MSigDB
RAMALHO_STEMNESS_UP	198	-1.90765	0	0.038788	MSigDB
DACOSTA_UV_RESPONSE_VIA_ERCC3_COMMON_DN	457	-1.90206	0	0.0403238	MSigDB
ACEVEDO_LIVER_TUMOR_VS_NORMAL_ADJACENT_TISSUE_UP	785	-1.89287	0	0.0432473	MSigDB
REACTOME_MEMBRANE_TRAFFICKING	127	-1.89211	0	0.0423066	MSigDB
PIGF_UP.V1_UP	181	-1.88631	0	0.0440741	MSigDB
KEGG_SELENOAMINO_ACID_METABOLISM	26	-1.87314	0	0.0503146	MSigDB
BOYAULT_LIVER_CANCER_SUBCLASS_G12_UP	36	-1.87283	0	0.0491	MSigDB
WAKABAYASHI_ADIPOGENESIS_PPARG_RXRA_BOUND_WITH_H4K20ME1_MARK	133	-1.87211	0	0.0481584	MSigDB
REACTOME_THE_ROLE_OF_NEF_IN_HIV1_REPLICATION_AND_DISEASE_PATHOGENESIS	27	-1.86947	0	0.0485255	MSigDB
ZHANG_TLX_TARGETS_36HR_UP	216	-1.86769	0	0.0485474	MSigDB
CAIRO_HEPATOBLASTOMA_POOR_SURVIVAL	16	-1.86759	0.00757576	0.0474159	MSigDB
BRACHAT_RESPONSE_TO_CISPLATIN	21	-1.86695	0.00564972	0.0466734	MSigDB
REACTOME_RNA_POL_I_RNA_POL_III_AND_MITOCHONDRIAL_TRANSCRIPTION	119	-1.86486	0	0.0465718	MSigDB
BOYAULT_LIVER_CANCER_SUBCLASS_G1_DN	38	-1.86461	0.00204499	0.0455595	MSigDB
PID_P38_MK2_PATHWAY	21	-1.86301	0	0.0454634	MSigDB
JUBAN_TARGETS_OF_SPI1_AND_FLI1_UP	112	-1.85244	0	0.0500449	MSigDB
REACTOME_REGULATION_OF_HYPOXIA_INDUCIBLE_FACTOR_HIF_BY_OXYGEN	24	-1.8466	0.0038835	0.0526062	MSigDB
REACTOME_MEIOTIC_SYNAPSIS	72	-1.83962	0	0.0557319	MSigDB
WANG_TARGETS_OF_MLL_CBP_FUSION_DN	44	-1.83833	0	0.0555011	MSigDB
SASSON_RESPONSE_TO_GONADOTROPHINS_UP	87	-1.83562	0	0.0560661	MSigDB
HALLMARK_ADIPOGENESIS	197	-1.83211	0	0.0569253	MSigDB
MTOR_UP.N4.V1_UP	192	-1.82988	0	0.0574268	MSigDB
SHEN_SMARCA2_TARGETS_UP	402	-1.82943	0	0.0566897	MSigDB
WENG_POR_TARGETS_GLOBAL_DN	22	-1.82588	0.00196078	0.0579816	MSigDB
SASSON_RESPONSE_TO_FORSKOLIN_UP	87	-1.82422	0	0.0582708	MSigDB
AMUNDSON_RESPONSE_TO_ARSENITE	211	-1.81938	0	0.0604587	MSigDB
ST_INTERLEUKIN_4_PATHWAY	26	-1.81662	0.00189753	0.0613855	MSigDB
DELLA_RESPONSE_TO_TSA_AND_BUTYRATE	21	-1.8162	0.00187266	0.0606046	MSigDB
CEBALLOS_TARGETS_OF_TP53_AND_MYC_UP	20	-1.81195	0.00795229	0.0624974	MSigDB
LANDIS_ERBB2_BREAST_PRENEOPLASTIC_DN	54	-1.80962	0.0019685	0.0631297	MSigDB
STARK_HYPPOCAMPUS_22Q11_DELETION_UP	48	-1.80879	0	0.0625268	MSigDB
MORI_EMU_MYC_LYMPHOMA_BY_ONSET_TIME_DN	16	-1.80757	0.00594059	0.0623179	MSigDB
SAGIV_CD24_TARGETS_UP	22	-1.80747	0.00614754	0.0613762	MSigDB
MCBRYAN_PUBERTAL_BREAST_5_6WK_DN	128	-1.80565	0	0.0616672	MSigDB
IIZUKA_LIVER_CANCER_PROGRESSION_L0_L1_UP	16	-1.80216	0.00574713	0.0628241	MSigDB
YANG_MUC2_TARGETS_DUODENUM_3MO_DN	22	-1.79789	0.00194175	0.0645703	MSigDB
HUANG_FOXA2_TARGETS_UP	44	-1.79453	0.00380952	0.0661135	MSigDB
SHAFFER_IRF4_TARGETS_IN_MYELOMA_VS_MATURE_B_LYMPHOCYTE	99	-1.79083	0	0.0678579	MSigDB
IWANAGA_CARCINOGENESIS_BY_KRAS_UP	154	-1.79043	0	0.067254	MSigDB
KEGG_CYSTEINE_AND_METHIONINE_METABOLISM	34	-1.78847	0	0.0677572	MSigDB
KIM_BIPOLAR_DISORDER_OLIGODENDROCYTE_DENSITY_CORR_UP	656	-1.7867	0	0.0681846	MSigDB
HALLMARK_UV_RESPONSE_UP	158	-1.7863	0	0.0674624	MSigDB
KIM_ALL_DISORDERS_CALB1_CORR_UP	531	-1.78337	0	0.0685801	MSigDB
RB_P107_DN.V1_DN	119	-1.78326	0	0.0677351	MSigDB
BROWNE_HCMV_INFECTION_16HR_UP	218	-1.7809	0	0.0682893	MSigDB
KEGG_LYSOSOME	121	-1.77794	0	0.069299	MSigDB
CHEN_HOXA5_TARGETS_9HR_UP	207	-1.76987	0	0.0743458	MSigDB
EGFR_UP.V1_UP	187	-1.76809	0	0.0748486	MSigDB
KOBAYASHI_EGFR_SIGNALING_24HR_UP	97	-1.76795	0	0.0740157	MSigDB
DURCHDEWALD_SKIN_CARCINOGENESIS_DN	256	-1.76757	0	0.073469	MSigDB
REACTOME_TRANSCRIPTION	197	-1.76329	0	0.0755684	MSigDB
HEDENFALK_BREAST_CANCER_BRACX_UP	19	-1.76032	0.00394477	0.0768678	MSigDB
BLALOCK_ALZHEIMERS_DISEASE_DN	1197	-1.76008	0	0.0761253	MSigDB
PODAR_RESPONSE_TO_ADAPHOSTIN_UP	140	-1.75853	0	0.076683	MSigDB
PID_PI3KCI_AKT_PATHWAY	34	-1.75768	0.00772201	0.0764373	MSigDB
ROYLANCE_BREAST_CANCER_16Q_COPY_NUMBER_UP	53	-1.75567	0.00204918	0.0771448	MSigDB
VALK_AML_CLUSTER_5	32	-1.75048	0.00387597	0.0805094	MSigDB
FLECHNER_BIOPSY_KIDNEY_TRANSPLANT_REJECTED_VS_OK_DN	532	-1.74503	0	0.0839879	MSigDB
PID_DNA_PK_PATHWAY	16	-1.74428	0.00384615	0.0836138	MSigDB
CHEN_PDGF_TARGETS	17	-1.74361	0.00972763	0.0833614	MSigDB
MARTINEZ_RESPONSE_TO_TRABECTEDIN_DN	255	-1.74176	0	0.0840661	MSigDB
ZHAN_MULTIPLE_MYELOMA_CD1_DN	41	-1.74155	0.00194932	0.0833502	MSigDB
SPIELMAN_LYMPHOBLAST_EUROPEAN_VS_ASIAN_DN	565	-1.73762	0	0.0858138	MSigDB
DING_LUNG_CANCER_EXPRESSION_BY_COPY_NUMBER	96	-1.73665	0	0.0858334	MSigDB
BASAKI_YBX1_TARGETS_DN	355	-1.73453	0	0.0868484	MSigDB
SESTO_RESPONSE_TO_UV_C5	46	-1.73384	0.00392157	0.0865158	MSigDB
REACTOME_TRANS_GOLGI_NETWORK_VESICLE_BUDDING	60	-1.73358	0	0.0858002	MSigDB
PENG_RAPAMYCIN_RESPONSE_DN	239	-1.73213	0	0.08624	MSigDB
CREIGHTON_ENDOCRINE_THERAPY_RESISTANCE_3	670	-1.72948	0	0.0877438	MSigDB
PID_INSULIN_PATHWAY	45	-1.72066	0.00404858	0.0946999	MSigDB
DAZARD_RESPONSE_TO_UV_NHEK_DN	301	-1.71985	0	0.0945383	MSigDB
YAO_TEMPORAL_RESPONSE_TO_PROGESTERONE_CLUSTER_12	76	-1.71629	0.00814664	0.0966887	MSigDB
REACTOME_GAP_JUNCTION_ASSEMBLY	18	-1.71424	0.00211416	0.0976497	MSigDB
ZHAN_V2_LATE_DIFFERENTIATION_GENES	43	-1.71408	0.00561798	0.0969836	MSigDB
WIKMAN_ASBESTOS_LUNG_CANCER_DN	26	-1.71322	0.00976562	0.0969894	MSigDB
NUCLEOBASENUCLEOSIDENUCLEOTIDE_AND_NUCLEIC_ACID_TRANSPORT	30	-1.71283	0.00603622	0.0964387	MSigDB
HASLINGER_B_CLL_WITH_11Q23_DELETION	23	-1.71073	0.012987	0.097394	MSigDB
FLECHNER_BIOPSY_KIDNEY_TRANSPLANT_OK_VS_DONOR_UP	531	-1.70867	0	0.0983984	MSigDB
