# Supplementary material for: Role of ETS1 in the Transcriptional Network of Diffuse Large B Cell Lymphoma of the Activated B Cell-Like Type
Source: Cancers (Basel). 2020 Jul 15;12(7):1912. doi: 10.3390/cancers12071912 (PMC7409072; doi:10.3390/cancers12071912)
Supplement: Supplementary file 1 [file cancers-12-01912-s001.zip › Table S3.xlsx]

## Sheet: Limma_ETS1vsCTR_RNASeq
gene_type	gene_status	gene_name	logFC	P.Value	adj.P.Val	ETS1_Regulation	ETS1_ChIP Overlap	BCL6_ChIP Overlap	PAX5_ChIP Overlap	PRDM1_ChIP Overlap	DN_BCL6_ChIP Overlap
protein_coding	KNOWN	ETS1	-1.32714	2.54e-11	3.16e-07	UPReg	no	no	no	no	no
protein_coding	KNOWN	L1CAM	-1.21552	8.34e-07	0.000636724	UPReg	no	no	no	no	no
lincRNA	NOVEL	RP11-102K13.5	-1.20776	1.76e-06	0.000993689	UPReg	no	no	no	no	no
protein_coding	KNOWN	SASH3	-0.962719	5.08e-11	3.16e-07	UPReg	yes	yes	no	no	no
protein_coding	KNOWN	LFNG	-0.942042	0.000150497	0.0187113	UPReg	no	no	no	no	no
protein_coding	KNOWN	ADAMTS7	-0.909578	1.21e-07	0.000167527	UPReg	no	no	no	no	no
protein_coding	KNOWN	PLXND1	-0.90705	2.94e-06	0.00140355	UPReg	no	no	no	no	no
protein_coding	KNOWN	MYRF	-0.898808	3.3e-08	6.75e-05	UPReg	yes	no	yes	no	no
protein_coding	KNOWN	PSTPIP1	-0.864653	2.55e-06	0.00132188	UPReg	yes	yes	no	no	no
protein_coding	KNOWN	IL32	-0.819447	9.19e-06	0.00272192	UPReg	yes	no	yes	no	no
protein_coding	KNOWN	TMC8	-0.783513	2.64e-09	1.09e-05	UPReg	no	no	no	no	no
protein_coding	KNOWN	LPAR5	-0.777684	2.46e-06	0.00132188	UPReg	yes	yes	yes	no	yes
protein_coding	KNOWN	KLHDC8B	-0.777212	0.000778202	0.0448329	UPReg	no	no	no	no	no
protein_coding	KNOWN	ARHGAP9	-0.770391	1.73e-08	4.31e-05	UPReg	yes	no	no	no	no
protein_coding	KNOWN	S100A4	-0.76584	4.58e-08	7.12e-05	UPReg	no	no	no	no	no
protein_coding	KNOWN	CDHR1	-0.744492	5.28e-05	0.00842084	UPReg	no	no	no	no	no
protein_coding	KNOWN	P2RX1	-0.720438	3.48e-07	0.000393326	UPReg	no	no	no	no	no
protein_coding	KNOWN	GRIN2D	-0.702931	0.000444644	0.0334023	UPReg	yes	no	yes	no	no
protein_coding	KNOWN	RYR1	-0.700514	3.45e-05	0.0066054	UPReg	no	no	no	no	no
protein_coding	KNOWN	ARL4C	-0.688308	5.53e-07	0.000491048	UPReg	no	no	no	no	no
protein_coding	KNOWN	FCMR	-0.679738	3.93e-05	0.00718521	UPReg	yes	yes	yes	yes	yes
protein_coding	KNOWN	SSH3	-0.679242	2.21e-05	0.00529128	UPReg	yes	no	yes	no	no
protein_coding	KNOWN	ANKRD65	-0.667895	3.44e-05	0.0066054	UPReg	no	no	no	no	no
protein_coding	KNOWN	RCSD1	-0.663583	4.24e-09	1.32e-05	UPReg	yes	yes	no	no	no
protein_coding	KNOWN	IFITM2	-0.656041	9.73e-07	0.000636724	UPReg	yes	no	no	no	no
protein_coding	KNOWN	VWA1	-0.650195	4.72e-05	0.00824707	UPReg	no	no	no	no	no
protein_coding	KNOWN	PADI2	-0.619223	7.38e-06	0.00254989	UPReg	no	no	no	no	no
protein_coding	KNOWN	OBSCN	-0.619169	2.98e-05	0.00627416	UPReg	no	no	no	no	no
protein_coding	KNOWN	ITGAX	-0.608933	7.04e-06	0.00249986	UPReg	no	no	no	no	no
lincRNA	NOVEL	RP11-834C11.4	-0.608117	0.000285758	0.0274868	UPReg	no	no	no	no	no
protein_coding	KNOWN	SPN	-0.603477	7e-06	0.00249986	UPReg	yes	yes	yes	no	no
protein_coding	KNOWN	F2R	-0.597147	1.78e-05	0.00452068	UPReg	no	no	no	no	no
protein_coding	KNOWN	SIT1	-0.590243	4.44e-06	0.00178167	UPReg	yes	yes	yes	yes	no
protein_coding	KNOWN	TOX2	-0.589711	9.46e-07	0.000636724	UPReg	yes	no	no	no	no
protein_coding	KNOWN	EPB41L1	-0.581463	3.43e-05	0.0066054	UPReg	no	no	no	no	no
protein_coding	KNOWN	NLGN2	-0.580147	4.91e-05	0.00835762	UPReg	yes	no	yes	no	no
protein_coding	KNOWN	GPSM3	-0.577093	7.07e-07	0.000585804	UPReg	yes	no	yes	no	no
protein_coding	KNOWN	MYO7A	-0.575022	0.00078877	0.0449506	UPReg	no	no	no	no	no
snoRNA	KNOWN	SNORD46	-0.56218	0.000658719	0.0405438	UPReg	yes	no	yes	no	no
processed_pseudogene	KNOWN	RPL13AP25	-0.561231	0.000142418	0.0180682	UPReg	no	no	no	no	no
protein_coding	KNOWN	TCL1B	-0.556123	1.6e-05	0.00414839	UPReg	yes	yes	no	no	no
protein_coding	KNOWN	RASAL3	-0.555912	2.28e-05	0.00533651	UPReg	yes	no	yes	no	no
protein_coding	KNOWN	CRYM	-0.537722	0.000163376	0.0197209	UPReg	no	no	no	no	no
protein_coding	KNOWN	APOL1	-0.536233	3.67e-05	0.00690712	UPReg	yes	no	no	yes	no
protein_coding	KNOWN	BRSK1	-0.532413	2.37e-05	0.00533651	UPReg	yes	yes	yes	no	no
protein_coding	KNOWN	PPP1R26	-0.530815	0.000378365	0.0307161	UPReg	no	no	no	no	no
protein_coding	KNOWN	SLC22A18	-0.528968	0.000795393	0.0449506	UPReg	no	no	no	no	no
protein_coding	KNOWN	RASGRP2	-0.526765	8.88e-07	0.000636724	UPReg	no	no	no	no	no
protein_coding	KNOWN	CDKN2D	-0.526109	0.000178162	0.020897	UPReg	yes	no	yes	no	no
protein_coding	KNOWN	HTRA3	-0.526015	0.000127351	0.0166669	UPReg	no	no	no	no	no
protein_coding	KNOWN	INF2	-0.524541	1.34e-06	0.00079251	UPReg	no	no	no	no	no
protein_coding	KNOWN	CCR7	-0.523002	0.000115167	0.0157348	UPReg	yes	no	yes	yes	no
protein_coding	KNOWN	NR4A3	-0.521514	0.000109388	0.0154547	UPReg	no	no	no	no	no
protein_coding	KNOWN	ACAP1	-0.514082	4.56e-07	0.000437608	UPReg	yes	no	yes	no	no
protein_coding	KNOWN	KLF2	-0.503497	4.98e-05	0.00837517	UPReg	no	no	no	no	no
sense_overlapping	NOVEL	RP4-647J21.1	-0.502167	8.39e-05	0.0122777	UPReg	no	no	no	no	no
protein_coding	KNOWN	GDF7	-0.497581	0.00024509	0.0253934	UPReg	yes	no	no	no	no
protein_coding	KNOWN	DSCAML1	-0.464506	0.000316396	0.0289246	UPReg	no	no	no	no	no
TEC	KNOWN	RP11-876N24.3	-0.464025	2.37e-05	0.00533651	UPReg	no	no	no	no	no
protein_coding	KNOWN	BBC3	-0.46314	0.000216446	0.0234006	UPReg	yes	no	yes	no	no
protein_coding	KNOWN	ITGAL	-0.461525	3.8e-08	6.75e-05	UPReg	yes	yes	yes	no	no
protein_coding	KNOWN	PLCB2	-0.460709	3.91e-05	0.00718521	UPReg	no	no	no	no	no
protein_coding	KNOWN	HLA-DQA1	-0.449816	0.000539738	0.0361645	UPReg	no	no	no	no	no
protein_coding	KNOWN	ITM2C	-0.448025	4.75e-05	0.00824707	UPReg	yes	no	yes	no	no
protein_coding	KNOWN	ADAM8	-0.447604	0.000111025	0.0155098	UPReg	yes	no	yes	no	no
protein_coding	KNOWN	SERPINF1	-0.445965	8.77e-06	0.00266055	UPReg	no	no	no	no	no
protein_coding	KNOWN	N4BP3	-0.444203	0.000336311	0.0296222	UPReg	yes	no	yes	no	no
protein_coding	KNOWN	SYNGR1	-0.442933	0.000413038	0.0322975	UPReg	no	no	no	no	no
protein_coding	KNOWN	FERMT3	-0.43501	1.17e-05	0.00331389	UPReg	yes	yes	yes	yes	no
protein_coding	KNOWN	KIF21B	-0.42822	0.000331935	0.0296222	UPReg	no	no	no	no	no
antisense	NOVEL	RP5-1171I10.5	-0.421108	4.78e-05	0.00824707	UPReg	no	no	no	no	no
protein_coding	KNOWN	SNX9	-0.417576	0.000301516	0.0281861	UPReg	no	no	no	no	no
protein_coding	KNOWN	SLC37A2	-0.417047	0.000131396	0.0168417	UPReg	no	no	no	no	no
protein_coding	KNOWN	B3GNT7	-0.415946	0.000754038	0.0440139	UPReg	yes	no	yes	no	no
protein_coding	KNOWN	ZNF524	-0.414123	8.86e-05	0.0128044	UPReg	yes	no	yes	yes	no
protein_coding	KNOWN	ZFP36	-0.409039	8.2e-06	0.00266055	UPReg	yes	no	yes	yes	no
protein_coding	KNOWN	HLA-DRB1	-0.405377	4.58e-07	0.000437608	UPReg	yes	no	no	no	no
protein_coding	KNOWN	S100A10	-0.404668	1.14e-05	0.0032965	UPReg	no	no	no	no	no
protein_coding	KNOWN	AURKC	-0.404302	0.000590777	0.0386153	UPReg	no	no	no	no	no
protein_coding	KNOWN	HLA-DRB5	-0.399751	0.000675686	0.0411804	UPReg	no	no	no	no	no
protein_coding	KNOWN	ANKRD62	-0.396754	0.000597791	0.0387101	UPReg	no	no	no	no	no
protein_coding	KNOWN	IL2RB	-0.393143	0.000881064	0.0475066	UPReg	yes	no	yes	yes	no
protein_coding	KNOWN	TGM2	-0.391687	0.000334115	0.0296222	UPReg	yes	no	yes	no	no
protein_coding	KNOWN	FMNL1	-0.389587	2.91e-06	0.00140355	UPReg	yes	yes	yes	yes	yes
protein_coding	KNOWN	COL24A1	-0.384407	0.000792874	0.0449506	UPReg	no	no	no	no	no
lincRNA	KNOWN	NEAT1	-0.377358	0.000279856	0.0272961	UPReg	yes	yes	yes	no	no
protein_coding	KNOWN	RAB8B	-0.3761	6.38e-05	0.00966834	UPReg	yes	no	yes	no	no
protein_coding	KNOWN	JAK3	-0.374723	3.87e-06	0.00160586	UPReg	yes	yes	yes	no	yes
protein_coding	KNOWN	FGD3	-0.374149	0.00013049	0.0168417	UPReg	yes	no	no	no	no
protein_coding	KNOWN	KCNAB2	-0.373113	1.34e-06	0.00079251	UPReg	yes	no	yes	no	no
protein_coding	KNOWN	THRA	-0.373037	0.000287403	0.0274868	UPReg	yes	no	yes	no	no
protein_coding	KNOWN	C12orf75	-0.372385	0.000806583	0.0453767	UPReg	no	no	no	no	no
protein_coding	KNOWN	HMHA1	-0.371794	8.23e-06	0.00266055	UPReg	yes	yes	yes	yes	no
protein_coding	KNOWN	HLA-DMB	-0.369871	5.16e-05	0.00842079	UPReg	no	no	no	no	no
protein_coding	KNOWN	MXRA7	-0.369549	0.000236675	0.0248396	UPReg	no	no	no	no	no
protein_coding	KNOWN	CACNB3	-0.366167	0.000270956	0.0272961	UPReg	yes	no	no	no	no
protein_coding	KNOWN	TNFAIP8L1	-0.3652	0.000215522	0.0234006	UPReg	no	no	no	no	no
protein_coding	KNOWN	DDAH2	-0.361173	5.48e-05	0.00862691	UPReg	no	no	no	no	no
protein_coding	KNOWN	DTX4	-0.358455	0.000123669	0.0165331	UPReg	yes	yes	yes	no	no
protein_coding	KNOWN	CIITA	-0.357811	1.87e-07	0.000232899	UPReg	yes	yes	yes	yes	no
protein_coding	KNOWN	TMEM254	-0.35774	0.000402475	0.031746	UPReg	no	no	no	no	no
protein_coding	KNOWN	RASGRF1	-0.355791	0.000932333	0.0491174	UPReg	no	no	no	no	no
protein_coding	KNOWN	CNKSR2	-0.355183	0.000524305	0.0358169	UPReg	no	no	no	no	no
protein_coding	KNOWN	LTBP3	-0.354462	0.000498106	0.0346648	UPReg	yes	no	yes	no	no
protein_coding	KNOWN	PTPRE	-0.352683	0.000127129	0.0166669	UPReg	no	no	no	no	no
protein_coding	KNOWN	S100A6	-0.352308	0.000161097	0.0196365	UPReg	no	no	no	no	no
protein_coding	KNOWN	ITGB2	-0.34987	0.000214385	0.0234006	UPReg	yes	yes	yes	no	yes
protein_coding	KNOWN	PDE4A	-0.349263	0.000179844	0.0208971	UPReg	yes	yes	yes	no	yes
protein_coding	KNOWN	IL16	-0.346072	5.72e-05	0.00888375	UPReg	yes	yes	yes	yes	yes
protein_coding	KNOWN	FXYD5	-0.343988	0.000351128	0.0296222	UPReg	no	no	no	no	no
protein_coding	KNOWN	TMEM159	-0.33813	0.000172217	0.0203922	UPReg	no	no	no	no	no
protein_coding	KNOWN	TSPO	-0.334191	0.000783634	0.0448982	UPReg	no	no	no	no	no
protein_coding	KNOWN	WDR54	-0.331936	0.000605289	0.0387915	UPReg	yes	no	yes	no	no
protein_coding	KNOWN	LAT2	-0.330219	8.67e-06	0.00266055	UPReg	yes	yes	yes	no	no
protein_coding	KNOWN	WIPF1	-0.329976	3.08e-05	0.00637884	UPReg	no	no	no	no	no
protein_coding	KNOWN	RARA	-0.327056	1.44e-05	0.00381449	UPReg	yes	no	yes	no	no
protein_coding	KNOWN	RARG	-0.32543	0.000736612	0.0436109	UPReg	yes	no	yes	no	no
protein_coding	KNOWN	SLC2A11	-0.323712	0.00046883	0.03422	UPReg	yes	yes	yes	yes	no
protein_coding	KNOWN	IL2RG	-0.321976	6.57e-06	0.00247363	UPReg	yes	no	no	no	no
protein_coding	KNOWN	MYO1G	-0.319892	1.4e-05	0.0037798	UPReg	yes	yes	yes	no	yes
protein_coding	KNOWN	CD22	-0.318848	3.44e-06	0.00153726	UPReg	yes	yes	no	no	no
protein_coding	KNOWN	PDLIM7	-0.315221	0.000899594	0.0476152	UPReg	yes	yes	yes	yes	yes
protein_coding	KNOWN	SEPN1	-0.314449	0.000603778	0.0387915	UPReg	yes	no	no	no	no
protein_coding	KNOWN	TLR6	-0.31364	0.00027296	0.0272961	UPReg	yes	no	yes	no	no
protein_coding	KNOWN	DOCK6	-0.308365	0.000261847	0.0269053	UPReg	no	no	no	no	no
protein_coding	KNOWN	ZFP14	-0.306175	0.000750265	0.0440002	UPReg	no	no	no	no	no
protein_coding	KNOWN	CD82	-0.304777	0.000122702	0.0165331	UPReg	yes	no	yes	no	no
protein_coding	KNOWN	TPCN1	-0.302279	0.000167688	0.0200467	UPReg	yes	no	yes	yes	no
protein_coding	KNOWN	EVI2B	-0.293292	0.000576707	0.0381914	UPReg	no	no	no	no	no
protein_coding	KNOWN	FCHO1	-0.286283	0.000464609	0.0341804	UPReg	yes	no	yes	no	no
protein_coding	KNOWN	NCF4	-0.285726	0.00087285	0.0475066	UPReg	yes	yes	yes	no	no
protein_coding	KNOWN	TSPAN33	-0.283527	3.19e-05	0.0063981	UPReg	yes	yes	yes	no	no
protein_coding	KNOWN	CD40	-0.274558	0.00062146	0.0390233	UPReg	yes	yes	yes	no	no
protein_coding	KNOWN	MICAL1	-0.272811	0.000229023	0.0243371	UPReg	yes	yes	yes	no	yes
protein_coding	KNOWN	ANXA6	-0.272308	2.1e-05	0.00511447	UPReg	yes	yes	yes	no	yes
protein_coding	KNOWN	DGKA	-0.271765	0.000445973	0.0334023	UPReg	yes	no	yes	no	no
protein_coding	KNOWN	LPXN	-0.271655	0.000351789	0.0296222	UPReg	yes	yes	no	no	no
protein_coding	KNOWN	ARHGAP30	-0.269652	3.8e-06	0.00160586	UPReg	yes	yes	yes	yes	yes
protein_coding	KNOWN	CYFIP2	-0.269466	0.000338761	0.0296222	UPReg	yes	no	yes	no	no
protein_coding	KNOWN	RILPL2	-0.267725	0.000211337	0.0234006	UPReg	yes	yes	yes	no	yes
protein_coding	KNOWN	C15orf57	-0.264665	0.000620107	0.0390233	UPReg	yes	yes	yes	yes	yes
protein_coding	KNOWN	MOB3A	-0.264229	0.000882652	0.0475066	UPReg	yes	yes	yes	no	no
protein_coding	KNOWN	LMO2	-0.262895	0.000348274	0.0296222	UPReg	yes	yes	yes	yes	no
protein_coding	KNOWN	PCSK7	-0.256383	0.000689917	0.0416349	UPReg	yes	no	no	no	no
IG_C_gene	KNOWN	IGHA1	-0.256306	0.000348918	0.0296222	UPReg	no	no	no	no	no
protein_coding	KNOWN	EVL	-0.256292	0.000278962	0.0272961	UPReg	yes	no	no	no	no
protein_coding	KNOWN	DOCK11	-0.25517	0.000113596	0.0156926	UPReg	no	no	no	no	no
protein_coding	KNOWN	PDE1B	-0.253829	0.000456595	0.0337908	UPReg	no	no	no	no	no
protein_coding	KNOWN	PDLIM1	-0.252388	2.68e-05	0.00585345	UPReg	no	no	no	no	no
protein_coding	KNOWN	SLC44A2	-0.251477	3.46e-06	0.00153726	UPReg	yes	yes	yes	no	yes
protein_coding	KNOWN	RGL2	-0.250953	0.000449531	0.0334672	UPReg	yes	yes	yes	yes	yes
protein_coding	KNOWN	CCDC69	-0.246015	6.5e-05	0.00974056	UPReg	yes	yes	yes	no	no
protein_coding	KNOWN	CD48	-0.242976	2.4e-05	0.00533651	UPReg	no	no	no	no	no
protein_coding	KNOWN	DOK3	-0.241966	0.000422079	0.0324272	UPReg	yes	yes	yes	yes	yes
protein_coding	KNOWN	CORO1A	-0.235886	0.000347983	0.0296222	UPReg	yes	yes	no	no	no
protein_coding	KNOWN	IRF5	-0.234983	0.000376843	0.0307161	UPReg	yes	no	yes	no	no
protein_coding	KNOWN	PTPN7	-0.231914	0.000281018	0.0272961	UPReg	yes	no	yes	no	no
protein_coding	KNOWN	RASA2	-0.229115	0.00089608	0.0476152	UPReg	yes	yes	yes	no	yes
protein_coding	KNOWN	CD79A	-0.227919	3.13e-05	0.00637884	UPReg	yes	yes	yes	no	no
protein_coding	KNOWN	HLA-DPB1	-0.226459	0.00088945	0.0476152	UPReg	no	no	no	no	no
protein_coding	KNOWN	DPYSL2	-0.226359	2.83e-05	0.00606087	UPReg	no	no	no	no	no
protein_coding	KNOWN	SP100	-0.225523	0.000156932	0.0193182	UPReg	yes	yes	yes	yes	yes
protein_coding	KNOWN	PXK	-0.22515	0.000476225	0.03422	UPReg	yes	yes	yes	no	no
protein_coding	KNOWN	IER2	-0.224934	0.000315205	0.0289246	UPReg	yes	yes	yes	no	yes
protein_coding	KNOWN	PPP1R18	-0.221111	0.000619349	0.0390233	UPReg	yes	no	yes	no	no
protein_coding	KNOWN	CHST2	-0.220346	0.000369081	0.0304528	UPReg	no	no	no	no	no
protein_coding	KNOWN	LAMTOR4	-0.219645	0.000476041	0.03422	UPReg	yes	yes	yes	yes	no
protein_coding	KNOWN	SGK223	-0.217141	0.000369852	0.0304528	UPReg	no	no	no	no	no
protein_coding	KNOWN	ZBTB37	-0.215468	0.000206594	0.0234006	UPReg	no	no	no	no	no
protein_coding	KNOWN	HLA-DPA1	-0.215268	0.000304278	0.028232	UPReg	no	no	no	no	no
protein_coding	KNOWN	GM2A	-0.210359	9.16e-05	0.0130969	UPReg	no	no	no	no	no
protein_coding	KNOWN	CAMK2D	-0.207326	0.000280002	0.0272961	UPReg	yes	no	yes	no	no
protein_coding	KNOWN	RHOG	-0.20534	0.000383004	0.0307219	UPReg	yes	no	yes	yes	no
protein_coding	KNOWN	SEPT9	-0.203772	0.000237747	0.0248396	UPReg	no	no	no	no	no
protein_coding	KNOWN	AGAP6	0.201157	0.000899991	0.0476152	DNReg	no	no	no	no	no
protein_coding	KNOWN	BRPF1	0.212615	0.000301146	0.0281861	DNReg	yes	yes	yes	no	no
protein_coding	KNOWN	SRPRB	0.221301	0.000497704	0.0346648	DNReg	no	no	no	no	no
protein_coding	KNOWN	HIST1H2AJ	0.22693	0.000536654	0.0361645	DNReg	yes	yes	yes	yes	no
protein_coding	KNOWN	ODC1	0.227651	0.000395934	0.0315554	DNReg	no	no	no	no	no
protein_coding	KNOWN	RPS6KB2	0.230426	0.000670981	0.0410951	DNReg	yes	no	yes	no	no
protein_coding	KNOWN	NVL	0.234047	0.000693189	0.0416349	DNReg	no	no	no	no	no
protein_coding	KNOWN	PDIA4	0.238392	0.000352617	0.0296222	DNReg	yes	no	no	no	no
protein_coding	KNOWN	DTD2	0.242294	0.000821471	0.0457998	DNReg	no	no	no	no	no
protein_coding	KNOWN	GNB4	0.251805	0.000146194	0.0183599	DNReg	no	no	no	no	no
protein_coding	KNOWN	ESCO2	0.252371	0.000689396	0.0416349	DNReg	yes	no	yes	no	no
protein_coding	KNOWN	SOD2	0.256826	0.000582236	0.0383013	DNReg	no	no	no	no	no
protein_coding	KNOWN	SCFD2	0.279302	0.000717642	0.0426911	DNReg	no	no	no	no	no
protein_coding	KNOWN	DHX35	0.285129	0.000188794	0.021734	DNReg	no	no	no	no	no
protein_coding	KNOWN	KHK	0.285902	0.000651946	0.0404248	DNReg	yes	no	yes	no	no
protein_coding	KNOWN	THAP5	0.286294	0.000211569	0.0234006	DNReg	no	no	no	no	no
protein_coding	KNOWN	PITX1	0.289745	0.000513528	0.0354705	DNReg	no	no	no	no	no
protein_coding	KNOWN	EVC	0.290181	0.000440381	0.0334023	DNReg	no	no	no	no	no
protein_coding	KNOWN	MTFMT	0.293122	0.000280404	0.0272961	DNReg	no	no	no	no	no
protein_coding	KNOWN	TIMM21	0.296634	0.000220068	0.0235871	DNReg	no	no	no	no	no
protein_coding	KNOWN	SPC25	0.299897	0.000489769	0.0345983	DNReg	no	no	no	no	no
protein_coding	KNOWN	PLBD1	0.300129	0.000577494	0.0381914	DNReg	no	no	no	no	no
protein_coding	KNOWN	GCFC2	0.303108	0.000483456	0.0343475	DNReg	no	no	no	no	no
protein_coding	KNOWN	XRCC3	0.304905	0.000878113	0.0475066	DNReg	no	no	no	no	no
protein_coding	KNOWN	DSCC1	0.314853	0.000352286	0.0296222	DNReg	yes	no	yes	no	no
protein_coding	KNOWN	HIST1H3F	0.318125	0.000499075	0.0346648	DNReg	yes	no	yes	yes	no
protein_coding	KNOWN	ENTPD7	0.328358	0.000209402	0.0234006	DNReg	no	no	no	no	no
protein_coding	KNOWN	TNFAIP2	0.328623	0.000478909	0.03422	DNReg	no	no	no	no	no
protein_coding	KNOWN	WWC1	0.329686	5.19e-05	0.00842079	DNReg	no	no	no	no	no
protein_coding	KNOWN	HOXA10	0.351136	0.00070118	0.0419124	DNReg	no	no	no	no	no
transcribed_processed_pseudogene	KNOWN	LINC01296	0.35687	0.000770422	0.0447601	DNReg	no	no	no	no	no
protein_coding	KNOWN	PAX9	0.360609	0.000443745	0.0334023	DNReg	no	no	no	no	no
protein_coding	KNOWN	RTN4IP1	0.364912	6.22e-05	0.00954326	DNReg	no	no	no	no	no
lincRNA	NOVEL	RP11-439C15.5	0.374855	0.000476973	0.03422	DNReg	no	no	no	no	no
protein_coding	KNOWN	CD36	0.377389	7.82e-05	0.011578	DNReg	no	no	no	no	no
protein_coding	KNOWN	DHRS11	0.380752	0.000523985	0.0358169	DNReg	no	no	no	no	no
protein_coding	KNOWN	CD3EAP	0.384323	0.000593222	0.0386153	DNReg	yes	no	yes	no	no
protein_coding	KNOWN	ENDOV	0.394451	0.00063866	0.0399018	DNReg	yes	no	yes	yes	no
antisense	NOVEL	MLK7-AS1	0.395422	0.000741795	0.0437096	DNReg	no	no	no	no	no
protein_coding	KNOWN	SMN2	0.397263	0.000418673	0.0324272	DNReg	no	no	no	no	no
protein_coding	KNOWN	TLCD1	0.425218	0.000541027	0.0361645	DNReg	yes	yes	yes	no	no
protein_coding	KNOWN	BTBD16	0.505409	1.87e-05	0.0046556	DNReg	no	no	no	no	no
processed_pseudogene	KNOWN	PDCL3P5	0.513468	0.000295169	0.028014	DNReg	no	no	no	no	no
antisense	NOVEL	CTD-2619J13.23	0.519962	0.000380461	0.0307161	DNReg	no	no	no	no	no
protein_coding	KNOWN	DDX60L	0.533384	0.000535508	0.0361645	DNReg	no	no	no	no	no
protein_coding	KNOWN	TNIP3	0.55285	0.000854368	0.0470016	DNReg	yes	no	no	yes	no
protein_coding	KNOWN	ARPP21	0.563981	1.23e-05	0.00339411	DNReg	no	no	no	no	no
protein_coding	KNOWN	CTTN	0.606208	5.73e-06	0.00222527	DNReg	no	no	no	no	no
lincRNA	NOVEL	RP11-141M1.3	0.611438	4.35e-05	0.00783364	DNReg	no	no	no	no	no
Mt_tRNA	KNOWN	MT-TS1	1.12907	8.45e-06	0.00266055	DNReg	no	no	no	no	no

## Sheet: CustomIOR_CTR
NAME	SIZE	NES	NOM p-val	FDR q-val	Source
SNOR	38	2.37058	0	0	CustomIOR
IMMUNE_DLBCL_GENES_PMID15550490	470	1.78506	0	0.00985731	CustomIOR
GENES_REPRESSED_BYIRF4_SPIB_GCB_DLBCL_PMID27799566	122	1.65155	0.00244499	0.0263023	CustomIOR
CANCER_IMMUNOTHERAPY_GENES_DLBCL_PMID28783722	47	1.50411	0.0256776	0.0714782	CustomIOR
ETS1SIRNA_ABC_DLBCL_DN	20	2.46959	0	0	CustomIOR
UP_BY_ANTI-CD20_AND_ANTI-BCR_IN_GCBDLBCL_SUDHL7_PMID21364752	128	2.33954	0	0	CustomIOR
DOWNREUGLATED_IN_FL_WITH_KMT2D_MUTATIONS_PMID26366710	305	2.05523	0	0.00038625	CustomIOR
HIGH_IN_CLL_CLUSTER1_VS_CLUSTER2_PMID24265505	207	1.9857	0	0.00211259	CustomIOR
UP_IN_MALT_TRANSLOCATED_VS_NONTRANSLOCATED_MALT_PMID18974375	118	1.97877	0	0.00181079	CustomIOR
MHC_PMID28052254	20	1.94528	0	0.0019581	CustomIOR
HIGH_IN_CLL_UNMUT_VS_MUT_PMID24265505	30	1.91657	0.00146628	0.00336892	CustomIOR
PQR309_ABC_DLBCL_UP_PMID29066507	297	1.90543	0	0.00371723	CustomIOR
UP_BY_BCR_STIMULATION_IN_SUDHL7_REC1_Z138_OCILY18_PMID21364752	21	1.87954	0	0.00438051	CustomIOR
DOWN_BY_ANTI-CD20_AND_ANTI-BCR_IN_MCL_REC1_PMID21364752	202	1.86602	0	0.00468835	CustomIOR
UP_BY_ANTI-CD20_AND_ANTI-BCR_IN_SUDHL7_REC1_PMID21364752	19	1.85807	0.00150376	0.00484594	CustomIOR
DUVELISIB_ABC_DLBCL_UP_PMID29066507	45	1.85373	0	0.00478628	CustomIOR
DOWNREGULATED_IN_BENDAMUSTINE_CLL_PMID26701728	178	1.83239	0	0.00621227	CustomIOR
IEGS33_LYMPHOMA_IMMUNE_ESCAPE_GENE_SET_PMID27622044	16	1.83054	0	0.00596338	CustomIOR
JQ1_MM_UP_PMID21889194	36	1.77127	0.00145773	0.0107392	CustomIOR
DOWN_IN_CD37NEG_ABC_PMID27760757	22	1.73286	0.00449102	0.0149546	CustomIOR
BRD4_SIGNATURE_PMID27099234	99	1.72829	0	0.014937	CustomIOR
IBRUTINIB_ABC_DLBCL_UP_PMID29066507	80	1.6885	0.00126904	0.0229214	CustomIOR
CHK1_RES_JEKO_UP_PMID26439697	117	1.67795	0.00121655	0.0241407	CustomIOR
JQ1_SIGNATURE_PMID27099234	180	1.67224	0	0.024817	CustomIOR
UPREGULATED_IN_BENDAMUSTINE_CLL_PMID26701728	90	1.66129	0.00255754	0.0267842	CustomIOR
JQ1_MM_AML_NEUROBLASTOMA_UP_PMID23430699	15	1.65596	0.0196721	0.0270476	CustomIOR
PQR309_GCB_DLBCL_UP_PMID29066507	462	1.65359	0	0.026728	CustomIOR
DOWNREGULATED_IN_KMT2D_KO_CD19-CRE_MOUSE_PMID26366712	57	1.64842	0.00681199	0.0261504	CustomIOR
ST7612AA1_UP_DLBCL_PMID25671299	156	1.59688	0.0023175	0.0397575	CustomIOR
IDELALISIB_ABC_DLBCL_UP_PMID29066507	154	1.59462	0	0.0392675	CustomIOR
GENES_INDUCED_BYIRF4_SPIB_ABC_DLBCL_PMID27799566	148	1.59036	0.00465116	0.0393377	CustomIOR
DOWN_IN_CD37NEG_DLBCL_PMID27760757	20	1.5772	0.0246914	0.0440319	CustomIOR
IMMUNOSTIMULATORY_MOLECULES_PMID28052254	20	1.57014	0.0323077	0.045815	CustomIOR
PPARG_ EXPERIMENTALLY_VERIFIED_HUMAN_TARGETS_PMID27148361	24	1.55818	0.0203125	0.0500981	CustomIOR
AZD5363_UP_DLBCL_PMID28202458	67	1.54129	0.0120321	0.0577125	CustomIOR
GSE10846_CHOP-GCB_ETS1_TOP100_DOWN	51	1.52452	0.0220083	0.0635229	CustomIOR
PLASMACYTOID DENDRITIC CELL_GENES_INDUCED_BYIRF4_SPIB_PMID27799566	87	1.52072	0.00773196	0.0637124	CustomIOR
AZD8835_UP_ABCDLBCL_PMID28202458	81	1.49651	0.0141026	0.0750094	CustomIOR
CD37NEG_DOWN_VS_CD37POS_DLBCL_PMID27760757	27	1.4844	0.0463097	0.0794357	CustomIOR
P65_SIGNATURE_PMID27099234	44	1.46686	0.0303468	0.090465	CustomIOR

## Sheet: CustomIOR_ETS1KD
NAME	SIZE	NES	NOM p-val	FDR q-val	Source
PLASMACELL_GENES_INDUCED_BYIRF4_SPIB_PMID27799566	80	-1.80295	0	0.00866887	CustomIOR
BAY1238097_DLBCL_DOWN_PMID28653353	366	-2.56194	0	0	CustomIOR
PQR309_ABC_DLBCL_DOWN_PMID29066507	366	-2.52134	0	0	CustomIOR
IDELALISIB_ABC_DLBCL_DOWN_PMID29066507	248	-2.24008	0	0.000634843	CustomIOR
IBRUTINIB_ABC_DLBCL_DOWN_PMID29066507	178	-2.10711	0	0.00135213	CustomIOR
AZD5363_DOWN_DLBCL_PMID28202458	34	-2.05017	0	0.00150993	CustomIOR
ST7612AA1_DOWN_DLBCL_PMID25671299	202	-2.03867	0	0.00145702	CustomIOR
DUVELISIB_ABC_DLBCL_DOWN_PMID29066507	59	-1.92178	0	0.00362182	CustomIOR
MCL_PROLIFERATION_SIGNATURE_PMID27846393	17	-1.84974	0	0.0070041	CustomIOR
IFN_INDUCED_BY_LENALIDOMIDE_GENES_PMID27799566	48	-1.8275	0	0.00808055	CustomIOR
CD3DQQQ_UP_PMID29453283	31	-1.78798	0	0.0091305	CustomIOR
JQ1_MM_DN_PMID21889194	39	-1.71418	0	0.0161993	CustomIOR
AZD8835_DOWN_ABCDLBCL_PMID28202458	70	-1.65389	0	0.0228307	CustomIOR
JQ1_MM_AML_NEUROBLASTOMA_DN_PMID23430699	28	-1.56156	0.0239521	0.0438581	CustomIOR
DOWN_IN_MALT_TRANSLOCATED_VS_NONTRANSLOCATED_MALT_PMID18974375	90	-1.56064	0.00465116	0.0421083	CustomIOR
GSE10846_CHOP-ABC_ETS1_TOP100_UP	93	-1.52248	0.00956938	0.0532566	CustomIOR

## Sheet: STAUDT_CTR
NAME	SIZE	NES	NOM p-val	FDR q-val	Source
MYD88_ALL_DOWN	183	2.11743	0	0	Staudt
BLIMP_BCELL_REPRESSED	61	2.03939	0	0.000145702	Staudt
PAX5_REPRESSED	37	1.96679	0	0.000823787	Staudt
CD40_UPREGULATED_BURKITT_LYMPHOMA	91	1.91533	0	0.00179629	Staudt
MYC_CHIP_PET_EXPR_DOWN	234	1.89897	0	0.00223861	Staudt
HIF1ALPHA_2X_UP	32	1.78527	0	0.00905768	Staudt
KRAS_UP	51	1.67407	0.00682128	0.0234158	Staudt
CLL_BCR_CROSSLINKING_UP_LYMPH_NODE_UP	23	1.60474	0.0190476	0.0384365	Staudt
HRAS_OVEREXPRESSION_4X_UP	46	1.60039	0.0070028	0.0391626	Staudt
CLL_BCR_CROSSLINKING_UP	52	1.52108	0.00972222	0.0705521	Staudt
GERMINAL_CENTER_BCELL_DLBCL	46	1.51507	0.0193103	0.0722027	Staudt
GC_B_CELL_BLLOW_DLBCLHIGH	33	1.50872	0.0463768	0.0721918	Staudt
QUIESCENCE_HEME_CLUSTER1	127	2.19456	0	0	Staudt
TCELL_PIREP_CALCIUMDEFPTUP4X_FESKE_FIG4	22	2.13163	0	0	Staudt
TCELL_PIREP_CALCIUMDEFPTUP4X_FESKE_FIG6	37	2.0766	0	0	Staudt
RESTING_BLOOD_B_CELL_GNF	65	2.04561	0	0.000174843	Staudt
TCELL_PIREP_CSAUP4X	15	2.03442	0	0.000255527	Staudt
HEMATOPOIETIC_NODE1658	73	2.03235	0	0.000223586	Staudt
HIF1ALPHA_1.5X_UP	92	2.01532	0	0.000309061	Staudt
TCELL_PIREP4X_FESKE_FIG4	21	1.97481	0	0.000906166	Staudt
THYMIC_DP_TCELL_GT_THYMIC_PROGENITOR_TCELL	45	1.92244	0	0.0017232	Staudt
SPLENIC_MARGINAL_ZONE_BCELL_GT_GC_BCELL	43	1.89584	0	0.00208937	Staudt
QUIESCENCE_HEME_ALL	232	1.85381	0	0.00360579	Staudt
BLOOD_MODULE-2.8_T_CELLS	68	1.83557	0.00133511	0.00461303	Staudt
KLF2_INDUCED	80	1.78218	0	0.0087729	Staudt
MYELOMA_PR_SUBGROUP_DOWN	40	1.76899	0.00420757	0.010073	Staudt
MCL_GT_SLL_DLBCL	25	1.76861	0.00307692	0.00968018	Staudt
TCELL_PIREP4X_FESKE_FIG6	52	1.76715	0	0.00944159	Staudt
CLL_MUTATED_GT_CLL_UNMUTATED	16	1.75308	0.00490998	0.0112344	Staudt
TCELL_CYTOKINE_REPRESSED	31	1.71408	0.00149701	0.0165579	Staudt
BLOOD_MODULE-2.6_MYELOID_LINEAGE-2	99	1.71008	0	0.0165085	Staudt
MYELOMA_CD-1_SUBGROUP_UP	29	1.68213	0.00431035	0.0220144	Staudt
TCELL_CYTOKINE_INDUCED_PMBCONLY_IINDUCED	32	1.6694	0.0120301	0.0237111	Staudt
NORMAL_MESENCHYMAL-1_NODE1643	19	1.66837	0.00787402	0.0232455	Staudt
GC_T_HELPER_UP4X_CHTANOVA	113	1.6565	0.00381194	0.0256628	Staudt
CC_1P5_UP	141	1.64836	0	0.027012	Staudt
STROMAL-1_DLBCL_SURVIVAL_PREDICTOR	70	1.63699	0.00531915	0.0290943	Staudt
REGULATORY_TCELL_FOXP3+_3X_GT_CD4+TCELL	18	1.54661	0.032967	0.0629439	Staudt
GC_T_HELPER_UP2X_CHTANOVA	316	1.54502	0	0.0622433	Staudt
MYELOMA_HY_SUBGROUP_UP	33	1.53004	0.024531	0.0693579	Staudt
RESTING_DENDRITIC_CELL_GNF	48	1.52928	0.0183876	0.0678699	Staudt
HRAS_OVEREXPRESSION_2X_UP	107	1.51324	0.00603136	0.0714328	Staudt
BLOOD_MODULE-1.7_MHC_RIBOSOMAL_PROTEINS	74	1.5077	0.0104849	0.0709959	Staudt
BLOOD_MODULE-1.3_B_CELLS	46	1.5056	0.0356164	0.0706984	Staudt
BLOOD_MODULE-3.8_UNDETERMINED	180	1.49958	0.00462428	0.0729169	Staudt
BLOOD_CD4+TCELL_GT_THYMIC_SP_CD4+TCELL	41	1.49847	0.041958	0.0719298	Staudt
CNS_PNS_NODE1663	100	1.49784	0.0185185	0.0708832	Staudt
THYMIC_SP_CD4+TCELL_GT_THYMIC_DP_TCELL	74	1.49526	0.0209699	0.071244	Staudt
CD8_T_EFFECTORDN_MEMORYIM_NAIVEUP	24	1.48353	0.0464768	0.0763617	Staudt
DENDRITIC_CELL_CD123POS_BLOOD	227	1.45598	0.00775194	0.0910365	Staudt

## Sheet: STAUDT_ETS1KD
NAME	SIZE	NES	NOM p-val	FDR q-val	Source
HIF1ALPHA_1.5X_DOWN	192	-3.04079	0	0	Staudt
MYC_OVEREXPRESSION_1.5X_UP	71	-2.96322	0	0	Staudt
MYC_CHIP_PET_EXPR_UP	359	-2.52459	0	0	Staudt
CELL_CYCLE_LIU	209	-2.03399	0	0.000846606	Staudt
PI3K_OVEREXPRESSION_UP	82	-2.03055	0	0.000776056	Staudt
XBP1_TARGET_SECRETORY	48	-1.97819	0	0.00155727	Staudt
MYC_RNAI_OCILY3	53	-1.91281	0	0.00254699	Staudt
XBP1_TARGET_ALL	69	-1.86473	0	0.00447616	Staudt
MYELOMA_TACI_LOW_PLASMABLAST_GENE	68	-1.85228	0	0.00492403	Staudt
CELL_CYCLE_CHO&WHITFIELD	82	-1.69099	0.00456621	0.0216669	Staudt
MYD88_INTERFERON_HBL1	16	-1.56035	0.0327869	0.0489648	Staudt
GLUTAMINE_STARVE_DOWN	290	-2.48367	0	0	Staudt
MYELOMA_PR_SUBGROUP_UP	42	-2.3184	0	0	Staudt
LEUCINE_STARVE_DOWN	170	-2.31675	0	0	Staudt
MYC_OVEREXPRESSION_2X_UP	26	-2.30085	0	0	Staudt
PROLIFERATION_NODE1618	57	-2.26477	0	0	Staudt
NOTCH_T-ALL_UP_PALOMERO	42	-2.20522	0	0	Staudt
RAPAMYCIN_BJAB_DOWN	198	-2.06456	0	0.000815478	Staudt
HIF1ALPHA_2X_DOWN	37	-2.0151	0	0.000815907	Staudt
TCELL_CYTOKINE_INDUCED_PROLIF	24	-1.9679	0	0.00181504	Staudt
SERUM_RESPONSE_FB_UP	165	-1.93477	0	0.00209029	Staudt
BLOOD_MODULE-3.1_INTERFERON_INDUCIBLE	70	-1.65082	0.00383142	0.029244	Staudt
GC_B_CELL_BLHIGH_DLBCLLOW	27	-1.62231	0.00289855	0.0345253	Staudt
E2F3_OVEREXPRESSION_4X_UP	18	-1.60633	0.0160428	0.0373317	Staudt
PROLIFERATION_NODE1542	28	-1.53035	0.028754	0.0590354	Staudt
MYELOMA_LB_SUBGROUP_DOWN	28	-1.47574	0.0430769	0.0825459	Staudt

## Sheet: MSigDB_CTR
NAME	SIZE	NES	NOM p-val	FDR q-val	Source
KEGG_CELL_ADHESION_MOLECULES_CAMS	55	2.40455	0	0	MSigDB
MARSON_FOXP3_TARGETS_UP	55	2.23186	0	0	MSigDB
MIKKELSEN_ES_ICP_WITH_H3K4ME3_AND_H3K27ME3	28	2.23053	0	0	MSigDB
MORI_LARGE_PRE_BII_LYMPHOCYTE_DN	55	2.17127	0	0.000207068	MSigDB
KEGG_INTESTINAL_IMMUNE_NETWORK_FOR_IGA_PRODUCTION	28	2.13087	0	0.000668398	MSigDB
MIKKELSEN_IPS_ICP_WITH_H3K4ME3_AND_H327ME3	25	2.11558	0	0.000837756	MSigDB
ODONNELL_TARGETS_OF_MYC_AND_TFRC_UP	63	2.10643	0	0.000953423	MSigDB
LEE_DIFFERENTIATING_T_LYMPHOCYTE	153	2.10361	0	0.000834245	MSigDB
BIOCARTA_IL2_PATHWAY	20	2.09611	0	0.000741551	MSigDB
KLEIN_PRIMARY_EFFUSION_LYMPHOMA_DN	58	2.07727	0	0.00099756	MSigDB
MORI_IMMATURE_B_LYMPHOCYTE_UP	49	2.05474	0	0.00136719	MSigDB
KEGG_PRIMARY_IMMUNODEFICIENCY	22	2.04143	0	0.00180708	MSigDB
HARRIS_HYPOXIA	46	2.03408	0	0.00211862	MSigDB
MANALO_HYPOXIA_UP	121	2.03197	0	0.00208905	MSigDB
MIKKELSEN_ES_LCP_WITH_H3K4ME3	44	2.03127	0	0.00194978	MSigDB
SPIELMAN_LYMPHOBLAST_EUROPEAN_VS_ASIAN_2FC_DN	18	2.02282	0	0.00219212	MSigDB
LEE_EARLY_T_LYMPHOCYTE_DN	42	1.99442	0	0.00363639	MSigDB
IMMUNE_RESPONSE	118	1.9632	0	0.00580706	MSigDB
IMMUNE_SYSTEM_PROCESS	174	1.95397	0	0.00655709	MSigDB
MORI_PRE_BI_LYMPHOCYTE_DN	71	1.95273	0	0.00631092	MSigDB
KEGG_ASTHMA	15	1.94517	0	0.00696629	MSigDB
TONKS_TARGETS_OF_RUNX1_RUNX1T1_FUSION_MONOCYTE_DN	35	1.93237	0.00140449	0.00821594	MSigDB
KEGG_AUTOIMMUNE_THYROID_DISEASE	24	1.92938	0	0.00818637	MSigDB
KEGG_DILATED_CARDIOMYOPATHY	36	1.92546	0	0.0080903	MSigDB
MORI_MATURE_B_LYMPHOCYTE_UP	81	1.92284	0	0.00796967	MSigDB
PASQUALUCCI_LYMPHOMA_BY_GC_STAGE_DN	138	1.92155	0	0.00776044	MSigDB
KEGG_GRAFT_VERSUS_HOST_DISEASE	22	1.91732	0.00153374	0.00787592	MSigDB
SHIN_B_CELL_LYMPHOMA_CLUSTER_3	19	1.90817	0	0.00846069	MSigDB
T_CELL_ACTIVATION	17	1.90706	0	0.00822699	MSigDB
BASSO_CD40_SIGNALING_UP	93	1.90586	0	0.00817836	MSigDB
PID_RAS_PATHWAY	25	1.89732	0	0.00913391	MSigDB
MIKKELSEN_MEF_HCP_WITH_H3_UNMETHYLATED	48	1.89374	0	0.00924292	MSigDB
KEGG_ALLOGRAFT_REJECTION	25	1.89018	0.00147275	0.00949315	MSigDB
HALLMARK_HYPOXIA	130	1.87147	0	0.0119219	MSigDB
KEGG_VIRAL_MYOCARDITIS	50	1.87083	0.00135135	0.011724	MSigDB
REACTOME_CELL_SURFACE_INTERACTIONS_AT_THE_VASCULAR_WALL	50	1.86652	0	0.0121223	MSigDB
TAKEDA_TARGETS_OF_NUP98_HOXA9_FUSION_8D_DN	84	1.86567	0	0.0118395	MSigDB
BIOCARTA_IL7_PATHWAY	16	1.85886	0	0.0128252	MSigDB
REACTOME_GPCR_DOWNSTREAM_SIGNALING	145	1.85871	0	0.0125398	MSigDB
REACTOME_INTEGRIN_CELL_SURFACE_INTERACTIONS	46	1.84341	0	0.0149457	MSigDB
TONKS_TARGETS_OF_RUNX1_RUNX1T1_FUSION_HSC_DN	115	1.83715	0	0.0155	MSigDB
ODONNELL_METASTASIS_UP	29	1.8235	0	0.0189178	MSigDB
HOFFMANN_SMALL_PRE_BII_TO_IMMATURE_B_LYMPHOCYTE_UP	50	1.8234	0	0.0185354	MSigDB
PID_IL2_STAT5_PATHWAY	25	1.82301	0	0.0183049	MSigDB
REGULATION_OF_HYDROLASE_ACTIVITY	49	1.81572	0	0.0199628	MSigDB
WIERENGA_STAT5A_TARGETS_GROUP2	32	1.8062	0.00292826	0.0225839	MSigDB
KEGG_TYPE_I_DIABETES_MELLITUS	27	1.78582	0.0060423	0.0290335	MSigDB
PID_EPHRINB_REV_PATHWAY	22	1.78438	0	0.028917	MSigDB
REACTOME_INTERFERON_GAMMA_SIGNALING	45	1.7768	0	0.031448	MSigDB
KEGG_HEMATOPOIETIC_CELL_LINEAGE	34	1.77607	0.00142857	0.0311366	MSigDB
ODONNELL_TFRC_TARGETS_UP	223	1.77574	0	0.030757	MSigDB
KEGG_HYPERTROPHIC_CARDIOMYOPATHY_HCM	33	1.77161	0.00286123	0.0317468	MSigDB
KLEIN_TARGETS_OF_BCR_ABL1_FUSION	32	1.76713	0.0046083	0.033203	MSigDB
PID_HIF1_TFPATHWAY	45	1.76007	0.00136612	0.0353809	MSigDB
LEE_DOUBLE_POLAR_THYMOCYTE	16	1.75753	0.00505902	0.0359692	MSigDB
HALLMARK_ALLOGRAFT_REJECTION	127	1.75435	0	0.036867	MSigDB
KEGG_TASTE_TRANSDUCTION	17	1.7542	0	0.0363376	MSigDB
REACTOME_G_ALPHA_I_SIGNALLING_EVENTS	41	1.75008	0	0.0375284	MSigDB
POSITIVE_REGULATION_OF_HYDROLASE_ACTIVITY	31	1.74891	0.00146628	0.0375339	MSigDB
REACTOME_IL_2_SIGNALING	33	1.74384	0.00137174	0.0388179	MSigDB
CELL_ACTIVATION	32	1.74229	0.00437956	0.0389519	MSigDB
RESPONSE_TO_EXTERNAL_STIMULUS	107	1.74121	0.00124224	0.0389872	MSigDB
SIG_BCR_SIGNALING_PATHWAY	45	1.74058	0.00557103	0.0386854	MSigDB
KEGG_LEUKOCYTE_TRANSENDOTHELIAL_MIGRATION	72	1.72489	0.00131926	0.0459037	MSigDB
POSITIVE_REGULATION_OF_CASPASE_ACTIVITY	21	1.71784	0.0124224	0.0489062	MSigDB
LYMPHOCYTE_ACTIVATION	28	1.71717	0.00298507	0.0484694	MSigDB
TONKS_TARGETS_OF_RUNX1_RUNX1T1_FUSION_HSC_UP	114	1.71708	0.00120482	0.0477967	MSigDB
PID_SHP2_PATHWAY	39	1.71539	0.002886	0.0482411	MSigDB
ZHENG_FOXP3_TARGETS_UP	18	1.71438	0.00308642	0.0481869	MSigDB
KEGG_LEISHMANIA_INFECTION	53	1.7133	0	0.0481564	MSigDB
ROSS_ACUTE_MYELOID_LEUKEMIA_CBF	54	1.71222	0.0055325	0.0479274	MSigDB
CHIARETTI_ACUTE_LYMPHOBLASTIC_LEUKEMIA_ZAP70	47	1.71127	0.00417827	0.047739	MSigDB
MIKKELSEN_NPC_HCP_WITH_H3K4ME3_AND_H3K27ME3	76	1.69767	0.00263505	0.0547935	MSigDB
KEGG_CYTOKINE_CYTOKINE_RECEPTOR_INTERACTION	74	1.69577	0.00127065	0.0552637	MSigDB
REACTOME_BASIGIN_INTERACTIONS	19	1.69121	0.0194611	0.057291	MSigDB
IL21_UP.V1_UP	67	1.69034	0.004	0.0570995	MSigDB
HALLMARK_INFLAMMATORY_RESPONSE	96	1.6886	0.00126904	0.0575004	MSigDB
OSWALD_HEMATOPOIETIC_STEM_CELL_IN_COLLAGEN_GEL_DN	206	1.68773	0	0.0572686	MSigDB
FURUKAWA_DUSP6_TARGETS_PCI35_UP	35	1.68762	0.0042796	0.0566073	MSigDB
SWEET_KRAS_TARGETS_UP	51	1.68572	0	0.0570608	MSigDB
REACTOME_SIGNALING_BY_GPCR	198	1.68249	0	0.0582883	MSigDB
LEUKOCYTE_ACTIVATION	31	1.68149	0.00291545	0.0583216	MSigDB
PID_IL2_1PATHWAY	49	1.67878	0.00286533	0.0592947	MSigDB
HOFFMANN_IMMATURE_TO_MATURE_B_LYMPHOCYTE_UP	34	1.67835	0.00587371	0.0588676	MSigDB
HALLMARK_EPITHELIAL_MESENCHYMAL_TRANSITION	68	1.67393	0.00265252	0.0606933	MSigDB
KEGG_NEUROACTIVE_LIGAND_RECEPTOR_INTERACTION	39	1.67392	0.004329	0.059997	MSigDB
MUSCLE_DEVELOPMENT	52	1.67242	0.00415512	0.0603154	MSigDB
REACTOME_GENERATION_OF_SECOND_MESSENGER_MOLECULES	16	1.67149	0.0194489	0.0603432	MSigDB
PID_IL4_2PATHWAY	47	1.66904	0.00265604	0.0612177	MSigDB
MIKKELSEN_IPS_LCP_WITH_H3K4ME3	63	1.66388	0.0012987	0.0637971	MSigDB
HALLMARK_HEDGEHOG_SIGNALING	20	1.66234	0.0151057	0.0640352	MSigDB
TARTE_PLASMA_CELL_VS_B_LYMPHOCYTE_DN	36	1.66165	0.0101449	0.063784	MSigDB
PID_P38_ALPHA_BETA_PATHWAY	29	1.66059	0.00574713	0.0638008	MSigDB
TAKEDA_TARGETS_OF_NUP98_HOXA9_FUSION_16D_DN	61	1.65782	0.00393701	0.06509	MSigDB
RESPONSE_TO_EXTRACELLULAR_STIMULUS	18	1.64804	0.0175439	0.0713764	MSigDB
HOFFMANN_PRE_BI_TO_LARGE_PRE_BII_LYMPHOCYTE_DN	41	1.64746	0.00990099	0.0710611	MSigDB
SHIPP_DLBCL_VS_FOLLICULAR_LYMPHOMA_DN	27	1.64598	0.0102639	0.0713118	MSigDB
ST_T_CELL_SIGNAL_TRANSDUCTION	33	1.64403	0.0133333	0.0720101	MSigDB
KEGG_AXON_GUIDANCE	72	1.64339	0.00132979	0.0718158	MSigDB
RESPONSE_TO_WOUNDING	67	1.63925	0.00133156	0.0740751	MSigDB
REACTOME_GPVI_MEDIATED_ACTIVATION_CASCADE	24	1.63624	0.0288316	0.075613	MSigDB
PID_INTEGRIN1_PATHWAY	22	1.63051	0.0242424	0.0794083	MSigDB
REACTOME_SIGNALING_BY_RHO_GTPASES	80	1.62865	0.00649351	0.0798806	MSigDB
REACTOME_POST_NMDA_RECEPTOR_ACTIVATION_EVENTS	21	1.62509	0.0251968	0.0818788	MSigDB
PID_BCR_5PATHWAY	64	1.62258	0.00408163	0.0829246	MSigDB
SIG_PIP3_SIGNALING_IN_B_LYMPHOCYTES	33	1.61899	0.0132159	0.0852166	MSigDB
REACTOME_GPCR_LIGAND_BINDING	66	1.61717	0.00951087	0.0857978	MSigDB
REACTOME_AXON_GUIDANCE	144	1.61439	0.00353774	0.0872212	MSigDB
REGULATION_OF_I_KAPPAB_KINASE_NF_KAPPAB_CASCADE	81	1.61427	0.00129199	0.0865047	MSigDB
MORI_PLASMA_CELL_DN	27	1.6083	0.0157819	0.0908756	MSigDB
HALLMARK_KRAS_SIGNALING_UP	85	1.60786	0.00126103	0.0904255	MSigDB
TAKEDA_TARGETS_OF_NUP98_HOXA9_FUSION_6HR_DN	24	1.60634	0.0244648	0.0908373	MSigDB
TORCHIA_TARGETS_OF_EWSR1_FLI1_FUSION_UP	172	1.60164	0.00114416	0.0943395	MSigDB
REACTOME_CLASS_A1_RHODOPSIN_LIKE_RECEPTORS	39	1.59941	0.0117302	0.0956107	MSigDB
PID_RHOA_REG_PATHWAY	31	1.59788	0.0122699	0.0960104	MSigDB
KEGG_RIBOSOME	85	1.59316	0.00650195	0.0997166	MSigDB
REACTOME_ACTIVATION_OF_NMDA_RECEPTOR_UPON_GLUTAMATE_BINDING_AND_POSTSYNAPTIC_EVENTS	21	1.59272	0.0183486	0.0992794	MSigDB
BIOCARTA_HDAC_PATHWAY	23	1.59158	0.0186916	0.0994188	MSigDB
REACTOME_TCR_SIGNALING	38	1.59069	0.0128388	0.099421	MSigDB
POSITIVE_REGULATION_OF_I_KAPPAB_KINASE_NF_KAPPAB_CASCADE	76	1.59021	0.00793651	0.0991429	MSigDB
REACTOME_TRANSMISSION_ACROSS_CHEMICAL_SYNAPSES	78	1.58944	0.00779221	0.0990561	MSigDB
TARTE_PLASMA_CELL_VS_PLASMABLAST_UP	188	1.58883	0	0.0987458	MSigDB
ORGAN_DEVELOPMENT	238	1.58714	0.00219058	0.0994762	MSigDB
IMMUNE_SYSTEM_DEVELOPMENT	48	1.58405	0.0125698	0.0997308	MSigDB
PID_SYNDECAN_1_PATHWAY	19	1.58395	0.0202177	0.0990441	MSigDB
KEGG_ECM_RECEPTOR_INTERACTION	24	1.58253	0.0251968	0.0996714	MSigDB
G_PROTEIN_SIGNALING_COUPLED_TO_CAMP_NUCLEOTIDE_SECOND_MESSENGER	17	1.58173	0.0240385	0.0996185	MSigDB
REACTOME_CELL_CELL_COMMUNICATION	62	1.58054	0.008	0.0999679	MSigDB
LEUKOCYTE_DIFFERENTIATION	20	1.57963	0.0267296	0.0993143	MSigDB

## Sheet: MSigDB_ETS1KD
NAME	SIZE	NES	NOM p-val	FDR q-val	Source
MANALO_HYPOXIA_DN	265	-3.09663	0	0	MSigDB
REACTOME_RNA_POL_I_PROMOTER_OPENING	51	-2.8578	0	0	MSigDB
REACTOME_RNA_POL_I_TRANSCRIPTION	74	-2.74127	0	0	MSigDB
REACTOME_RNA_POL_I_RNA_POL_III_AND_MITOCHONDRIAL_TRANSCRIPTION	105	-2.70214	0	0	MSigDB
HALLMARK_MYC_TARGETS_V1	199	-2.69452	0	0	MSigDB
HALLMARK_MYC_TARGETS_V2	56	-2.674	0	0	MSigDB
SCHUHMACHER_MYC_TARGETS_UP	76	-2.6585	0	0	MSigDB
REACTOME_MEIOSIS	90	-2.6295	0	0	MSigDB
MORI_IMMATURE_B_LYMPHOCYTE_DN	85	-2.50955	0	0	MSigDB
REACTOME_CELL_CYCLE	373	-2.4353	0	0	MSigDB
SCHLOSSER_MYC_TARGETS_REPRESSED_BY_SERUM	152	-2.43381	0	0	MSigDB
SCHLOSSER_MYC_TARGETS_AND_SERUM_RESPONSE_UP	46	-2.39945	0	0	MSigDB
REACTOME_MRNA_PROCESSING	150	-2.23911	0	0.00012609	MSigDB
SCHLOSSER_MYC_TARGETS_AND_SERUM_RESPONSE_DN	46	-2.23027	0	0.000196236	MSigDB
SCHLOSSER_MYC_AND_SERUM_RESPONSE_SYNERGY	31	-2.20294	0	0.000378484	MSigDB
COLLER_MYC_TARGETS_UP	23	-2.18062	0	0.000344841	MSigDB
REACTOME_MRNA_SPLICING	104	-2.15891	0	0.000613195	MSigDB
REACTOME_METABOLISM_OF_NON_CODING_RNA	48	-2.14403	0	0.000720175	MSigDB
EGUCHI_CELL_CYCLE_RB1_TARGETS	23	-2.12949	0	0.00070507	MSigDB
KEGG_SPLICEOSOME	123	-2.03976	0	0.00197907	MSigDB
MENSSEN_MYC_TARGETS	47	-2.0094	0	0.00266657	MSigDB
REACTOME_MRNA_SPLICING_MINOR_PATHWAY	40	-1.98258	0	0.00340286	MSigDB
KEGG_CELL_CYCLE	115	-1.90852	0	0.0066987	MSigDB
MRNA_METABOLIC_PROCESS	80	-1.78013	0	0.0185184	MSigDB
REACTOME_ACTIVATION_OF_NF_KAPPAB_IN_B_CELLS	61	-1.73868	0	0.0250459	MSigDB
TARTE_PLASMA_CELL_VS_B_LYMPHOCYTE_UP	68	-1.65804	0	0.0441634	MSigDB
CELL_CYCLE_PROCESS	169	-1.64743	0	0.0460932	MSigDB
RNA_PROCESSING	165	-1.64156	0	0.0480345	MSigDB
REACTOME_MEIOTIC_RECOMBINATION	69	-2.82064	0	0	MSigDB
REACTOME_TELOMERE_MAINTENANCE	69	-2.80899	0	0	MSigDB
REACTOME_AMYLOIDS	53	-2.76312	0	0	MSigDB
REACTOME_PACKAGING_OF_TELOMERE_ENDS	42	-2.75699	0	0	MSigDB
REACTOME_MEIOTIC_SYNAPSIS	58	-2.58917	0	0	MSigDB
HALLMARK_E2F_TARGETS	199	-2.56568	0	0	MSigDB
REACTOME_DEPOSITION_OF_NEW_CENPA_CONTAINING_NUCLEOSOMES_AT_THE_CENTROMERE	56	-2.55112	0	0	MSigDB
REACTOME_CHROMOSOME_MAINTENANCE	104	-2.49936	0	0	MSigDB
REACTOME_TRANSCRIPTION	186	-2.49444	0	0	MSigDB
PENG_GLUTAMINE_DEPRIVATION_DN	313	-2.46242	0	0	MSigDB
REACTOME_ACTIVATION_OF_ATR_IN_RESPONSE_TO_REPLICATION_STRESS	34	-2.40542	0	0	MSigDB
REN_BOUND_BY_E2F	60	-2.38475	0	0	MSigDB
REACTOME_PROCESSING_OF_CAPPED_INTRON_CONTAINING_PRE_MRNA	133	-2.34706	0	0	MSigDB
REACTOME_S_PHASE	104	-2.34298	0	0	MSigDB
REACTOME_SYNTHESIS_OF_DNA	89	-2.33831	0	0	MSigDB
PENG_LEUCINE_DEPRIVATION_DN	178	-2.33513	0	0	MSigDB
REACTOME_DNA_REPLICATION	180	-2.30246	0	4.7434e-05	MSigDB
REACTOME_G1_S_TRANSITION	103	-2.30237	0	4.58529e-05	MSigDB
REACTOME_MITOTIC_G1_G1_S_PHASES	125	-2.26317	0	9.23515e-05	MSigDB
MORI_LARGE_PRE_BII_LYMPHOCYTE_UP	80	-2.24857	0	0.000137911	MSigDB
REACTOME_CELL_CYCLE_MITOTIC	296	-2.24613	0	0.000133732	MSigDB
REACTOME_M_G1_TRANSITION	77	-2.24392	0	0.000129799	MSigDB
PID_ATR_PATHWAY	36	-2.2354	0	0.000201687	MSigDB
REACTOME_CELL_CYCLE_CHECKPOINTS	110	-2.21684	0	0.000334508	MSigDB
REACTOME_MITOTIC_M_M_G1_PHASES	161	-2.20791	0	0.000397894	MSigDB
REACTOME_ACTIVATION_OF_THE_PRE_REPLICATIVE_COMPLEX	29	-2.20384	0	0.000387946	MSigDB
REACTOME_ASSEMBLY_OF_THE_PRE_REPLICATIVE_COMPLEX	63	-2.19394	0	0.000369473	MSigDB
KEGG_DNA_REPLICATION	35	-2.18511	0	0.00036088	MSigDB
REACTOME_DNA_STRAND_ELONGATION	30	-2.18065	0	0.000352679	MSigDB
BIOCARTA_MCM_PATHWAY	17	-2.14334	0	0.000705171	MSigDB
PENG_RAPAMYCIN_RESPONSE_DN	226	-2.13364	0	0.000719459	MSigDB
HALLMARK_UNFOLDED_PROTEIN_RESPONSE	107	-2.11242	0	0.000825654	MSigDB
REACTOME_UNFOLDED_PROTEIN_RESPONSE	71	-2.11136	0	0.000809776	MSigDB
BIOCARTA_PROTEASOME_PATHWAY	28	-2.06247	0	0.00141004	MSigDB
REACTOME_ORC1_REMOVAL_FROM_CHROMATIN	64	-2.06196	0	0.00141033	MSigDB
CROONQUIST_IL6_DEPRIVATION_DN	94	-2.06116	0	0.00138469	MSigDB
REACTOME_TRANSPORT_OF_MATURE_TRANSCRIPT_TO_CYTOPLASM	52	-2.06003	0	0.00135997	MSigDB
REACTOME_G2_M_CHECKPOINTS	40	-2.0531	0	0.00165806	MSigDB
LEE_EARLY_T_LYMPHOCYTE_UP	90	-2.05229	0	0.00162948	MSigDB
REACTOME_E2F_MEDIATED_REGULATION_OF_DNA_REPLICATION	31	-2.05062	0	0.00172119	MSigDB
HALLMARK_G2M_CHECKPOINT	192	-2.03875	0	0.00194663	MSigDB
MORI_PRE_BI_LYMPHOCYTE_UP	63	-2.03662	0	0.00193768	MSigDB
REACTOME_HIV_LIFE_CYCLE	106	-2.03084	0	0.00217819	MSigDB
REACTOME_LATE_PHASE_OF_HIV_LIFE_CYCLE	94	-2.02744	0	0.00221408	MSigDB
REACTOME_G1_S_SPECIFIC_TRANSCRIPTION	16	-2.01883	0	0.00244237	MSigDB
REACTOME_TRANSPORT_OF_RIBONUCLEOPROTEINS_INTO_THE_HOST_NUCLEUS	27	-2.01752	0	0.00244713	MSigDB
REACTOME_RNA_POL_III_TRANSCRIPTION_TERMINATION	18	-2.01008	0	0.00266475	MSigDB
REACTOME_DESTABILIZATION_OF_MRNA_BY_AUF1_HNRNP_D0	50	-2.00512	0	0.00280859	MSigDB
REACTOME_EXTENSION_OF_TELOMERES	27	-1.98383	0.00309598	0.00343139	MSigDB
ELECTRON_TRANSPORT_GO_0006118	34	-1.97493	0	0.00365902	MSigDB
REACTOME_CYCLIN_E_ASSOCIATED_EVENTS_DURING_G1_S_TRANSITION_	61	-1.96894	0	0.00393304	MSigDB
REACTOME_REGULATION_OF_MITOTIC_CELL_CYCLE	76	-1.96311	0	0.004205	MSigDB
REACTOME_NEP_NS2_INTERACTS_WITH_THE_CELLULAR_EXPORT_MACHINERY	27	-1.96212	0	0.00420525	MSigDB
REACTOME_REGULATION_OF_ORNITHINE_DECARBOXYLASE_ODC	47	-1.95919	0	0.00429731	MSigDB
PID_MYC_ACTIV_PATHWAY	74	-1.95837	0	0.00427822	MSigDB
REACTOME_SCFSKP2_MEDIATED_DEGRADATION_OF_P27_P21	52	-1.95659	0	0.00424161	MSigDB
KAUFFMANN_DNA_REPAIR_GENES	210	-1.95498	0	0.00425866	MSigDB
REACTOME_APC_C_CDC20_MEDIATED_DEGRADATION_OF_MITOTIC_PROTEINS	65	-1.95376	0	0.0042413	MSigDB
HESS_TARGETS_OF_HOXA9_AND_MEIS1_UP	55	-1.94032	0	0.00486428	MSigDB
REACTOME_CDT1_ASSOCIATION_WITH_THE_CDC6_ORC_ORIGIN_COMPLEX	54	-1.93833	0	0.00487254	MSigDB
ODONNELL_TARGETS_OF_MYC_AND_TFRC_DN	42	-1.93806	0	0.00488217	MSigDB
REACTOME_REGULATION_OF_GLUCOKINASE_BY_GLUCOKINASE_REGULATORY_PROTEIN	25	-1.93641	0.00293255	0.00487514	MSigDB
REACTOME_CDK_MEDIATED_PHOSPHORYLATION_AND_REMOVAL_OF_CDC6	46	-1.92951	0.00363636	0.00517844	MSigDB
HOFFMANN_LARGE_TO_SMALL_PRE_BII_LYMPHOCYTE_UP	149	-1.92491	0	0.00538338	MSigDB
KEGG_SYSTEMIC_LUPUS_ERYTHEMATOSUS	88	-1.91662	0	0.00609179	MSigDB
RIBONUCLEOPROTEIN_COMPLEX_BIOGENESIS_AND_ASSEMBLY	82	-1.90971	0	0.00666459	MSigDB
MOREAUX_B_LYMPHOCYTE_MATURATION_BY_TACI_DN	67	-1.90672	0	0.00671799	MSigDB
REACTOME_APC_C_CDH1_MEDIATED_DEGRADATION_OF_CDC20_AND_OTHER_APC_C_CDH1_TARGETED_PROTEINS_IN_LATE_MITOSIS_EARLY_G1	64	-1.9066	0.00350877	0.00665914	MSigDB
REACTOME_CROSS_PRESENTATION_OF_SOLUBLE_EXOGENOUS_ANTIGENS_ENDOSOMES	42	-1.90391	0	0.00681287	MSigDB
REACTOME_G0_AND_EARLY_G1	21	-1.89811	0.0025974	0.00710114	MSigDB
KEGG_BASAL_TRANSCRIPTION_FACTORS	29	-1.89496	0.00307692	0.00729417	MSigDB
REACTOME_AUTODEGRADATION_OF_CDH1_BY_CDH1_APC_C	56	-1.89338	0	0.00733582	MSigDB
REACTOME_TRANSPORT_OF_MATURE_MRNA_DERIVED_FROM_AN_INTRONLESS_TRANSCRIPT	32	-1.88939	0.00341297	0.00755559	MSigDB
MRNA_PROCESSING_GO_0006397	69	-1.88452	0	0.00795582	MSigDB
REACTOME_LAGGING_STRAND_SYNTHESIS	19	-1.88413	0.0108401	0.00793163	MSigDB
PID_FANCONI_PATHWAY	44	-1.88279	0	0.0079366	MSigDB
REACTOME_SCF_BETA_TRCP_MEDIATED_DEGRADATION_OF_EMI1	49	-1.88261	0	0.00787089	MSigDB
PELLICCIOTTA_HDAC_IN_ANTIGEN_PRESENTATION_DN	49	-1.87893	0	0.00810207	MSigDB
MOREAUX_MULTIPLE_MYELOMA_BY_TACI_DN	162	-1.8686	0	0.00893333	MSigDB
KEGG_RNA_POLYMERASE	27	-1.86623	0	0.00909638	MSigDB
REACTOME_FORMATION_OF_TUBULIN_FOLDING_INTERMEDIATES_BY_CCT_TRIC	17	-1.86422	0.0132275	0.00923608	MSigDB
KEGG_PROTEASOME	42	-1.8622	0	0.00939026	MSigDB
REACTOME_MITOCHONDRIAL_PROTEIN_IMPORT	47	-1.84337	0.00371747	0.0112535	MSigDB
REACTOME_DNA_REPAIR	101	-1.84078	0	0.0114679	MSigDB
REACTOME_INTERACTIONS_OF_VPR_WITH_HOST_CELLULAR_PROTEINS	31	-1.83972	0	0.0114939	MSigDB
IKEDA_MIR30_TARGETS_DN	18	-1.8369	0.00289855	0.0117912	MSigDB
TAKEDA_TARGETS_OF_NUP98_HOXA9_FUSION_10D_UP	84	-1.83519	0	0.0118773	MSigDB
REACTOME_ACTIVATION_OF_CHAPERONE_GENES_BY_XBP1S	42	-1.82671	0	0.012708	MSigDB
REACTOME_REGULATION_OF_APOPTOSIS	52	-1.81958	0.00378788	0.0135851	MSigDB
PID_BARD1_PATHWAY	29	-1.81827	0	0.0135895	MSigDB
REACTOME_P53_DEPENDENT_G1_DNA_DAMAGE_RESPONSE	53	-1.81281	0	0.0141771	MSigDB
REACTOME_RNA_POL_II_TRANSCRIPTION	95	-1.81252	0	0.0141027	MSigDB
TONKS_TARGETS_OF_RUNX1_RUNX1T1_FUSION_MONOCYTE_UP	142	-1.8091	0	0.0144352	MSigDB
REACTOME_ASPARAGINE_N_LINKED_GLYCOSYLATION	73	-1.79115	0	0.0170224	MSigDB
GREENBAUM_E2A_TARGETS_UP	28	-1.76872	0	0.0205191	MSigDB
REACTOME_P53_INDEPENDENT_G1_S_DNA_DAMAGE_CHECKPOINT	48	-1.75322	0.00342466	0.0231886	MSigDB
REACTOME_RNA_POL_III_CHAIN_ELONGATION	16	-1.7508	0.00268097	0.0234289	MSigDB
REACTOME_RNA_POL_III_TRANSCRIPTION_INITIATION_FROM_TYPE_2_PROMOTER	22	-1.74715	0.0026455	0.0240434	MSigDB
PROTEIN_FOLDING	51	-1.74302	0	0.0247009	MSigDB
REACTOME_ANTIVIRAL_MECHANISM_BY_IFN_STIMULATED_GENES	63	-1.74007	0.0201613	0.0249535	MSigDB
ACOSTA_PROLIFERATION_INDEPENDENT_MYC_TARGETS_UP	69	-1.73868	0	0.0248471	MSigDB
REACTOME_RNA_POL_II_TRANSCRIPTION_PRE_INITIATION_AND_PROMOTER_OPENING	38	-1.73705	0.00315457	0.025038	MSigDB
M_PHASE	97	-1.73247	0.00549451	0.0260365	MSigDB
CELL_CYCLE_GO_0007049	265	-1.73139	0	0.0261418	MSigDB
PELLICCIOTTA_HDAC_IN_ANTIGEN_PRESENTATION_UP	61	-1.72432	0	0.027604	MSigDB
REACTOME_GLOBAL_GENOMIC_NER_GG_NER	32	-1.72203	0.0125786	0.0279862	MSigDB
REACTOME_TRNA_AMINOACYLATION	42	-1.72051	0.00660066	0.0280846	MSigDB
REACTOME_SIGNALING_BY_WNT	61	-1.72022	0	0.0279366	MSigDB
CELL_CYCLE_PHASE	146	-1.71852	0	0.0280945	MSigDB
REACTOME_CYTOSOLIC_TRNA_AMINOACYLATION	24	-1.69493	0.010929	0.034382	MSigDB
TOYOTA_TARGETS_OF_MIR34B_AND_MIR34C	381	-1.68067	0	0.038398	MSigDB
REACTOME_REGULATION_OF_MRNA_STABILITY_BY_PROTEINS_THAT_BIND_AU_RICH_ELEMENTS	80	-1.67919	0.00440529	0.0386198	MSigDB
KAUFFMANN_DNA_REPLICATION_GENES	123	-1.67464	0	0.0398002	MSigDB
REACTOME_RNA_POL_III_TRANSCRIPTION	32	-1.66797	0.00952381	0.0416449	MSigDB
REACTOME_PERK_REGULATED_GENE_EXPRESSION	24	-1.66773	0.0169972	0.0414693	MSigDB
REACTOME_RNA_POL_II_PRE_TRANSCRIPTION_EVENTS	53	-1.66353	0	0.0425151	MSigDB
REACTOME_NUCLEOTIDE_EXCISION_REPAIR	47	-1.6544	0.00353357	0.0451461	MSigDB
REACTOME_AUTODEGRADATION_OF_THE_E3_UBIQUITIN_LIGASE_COP1	47	-1.65363	0.00704225	0.0451963	MSigDB
REACTOME_ER_PHAGOSOME_PATHWAY	57	-1.65313	0.00423729	0.0450706	MSigDB
RIBOSOME_BIOGENESIS_AND_ASSEMBLY	18	-1.65254	0.023622	0.0449553	MSigDB
KEGG_NUCLEOTIDE_EXCISION_REPAIR	41	-1.64956	0.0035461	0.0456667	MSigDB
KEGG_BASE_EXCISION_REPAIR	33	-1.63139	0.0177515	0.0515169	MSigDB
ODONNELL_TFRC_TARGETS_DN	103	-1.62523	0	0.053883	MSigDB
KEGG_MISMATCH_REPAIR	22	-1.62113	0.0180723	0.0550545	MSigDB
PROTEIN_RNA_COMPLEX_ASSEMBLY	63	-1.62042	0.0111111	0.0550022	MSigDB
REACTOME_DIABETES_PATHWAYS	95	-1.61732	0	0.0559686	MSigDB
REACTOME_VIF_MEDIATED_DEGRADATION_OF_APOBEC3G	49	-1.60911	0.00687285	0.0592248	MSigDB
REACTOME_HIV_INFECTION	181	-1.60894	0	0.0589083	MSigDB
MITOTIC_CELL_CYCLE	139	-1.60191	0	0.0615465	MSigDB
TARTE_PLASMA_CELL_VS_PLASMABLAST_DN	300	-1.60105	0	0.0616386	MSigDB
REACTOME_PROCESSIVE_SYNTHESIS_ON_THE_LAGGING_STRAND	15	-1.59724	0.0255754	0.0630884	MSigDB
REACTOME_PURINE_METABOLISM	26	-1.59607	0.0174419	0.063215	MSigDB
RRNA_PROCESSING	15	-1.59588	0.0280112	0.0628846	MSigDB
HALLMARK_UV_RESPONSE_UP	114	-1.59493	0	0.0630542	MSigDB
RRNA_METABOLIC_PROCESS	15	-1.59481	0.0242588	0.062693	MSigDB
REACTOME_MITOTIC_PROMETAPHASE	80	-1.58993	0.00444444	0.0644349	MSigDB
KEGG_RNA_DEGRADATION	56	-1.58254	0.00754717	0.0677677	MSigDB
REACTOME_CLEAVAGE_OF_GROWING_TRANSCRIPT_IN_THE_TERMINATION_REGION_	42	-1.5807	0.0168919	0.0683461	MSigDB
NUCLEOBASENUCLEOSIDE_AND_NUCLEOTIDE_METABOLIC_PROCESS	40	-1.57949	0.00338983	0.0683895	MSigDB
REACTOME_TRANSPORT_TO_THE_GOLGI_AND_SUBSEQUENT_MODIFICATION	28	-1.57933	0.0205882	0.068058	MSigDB
REGULATION_OF_CYCLIN_DEPENDENT_PROTEIN_KINASE_ACTIVITY	37	-1.57765	0.0206186	0.0684388	MSigDB
KEGG_PROTEIN_EXPORT	23	-1.57378	0.0384615	0.0699267	MSigDB
REACTOME_TRANSCRIPTION_COUPLED_NER_TC_NER	42	-1.57086	0.0159744	0.0710809	MSigDB
KEGG_GLYCOSYLPHOSPHATIDYLINOSITOL_GPI_ANCHOR_BIOSYNTHESIS	23	-1.56893	0.0176471	0.0717296	MSigDB
GROSS_HYPOXIA_VIA_HIF1A_UP	72	-1.56748	0.0119048	0.0720983	MSigDB
KEGG_CITRATE_CYCLE_TCA_CYCLE	27	-1.56455	0.0302115	0.0728832	MSigDB
BILD_MYC_ONCOGENIC_SIGNATURE	156	-1.56342	0	0.0731104	MSigDB
KEGG_AMINOACYL_TRNA_BIOSYNTHESIS	40	-1.56218	0.0166667	0.0733055	MSigDB
TAKEDA_TARGETS_OF_NUP98_HOXA9_FUSION_3D_UP	93	-1.55823	0	0.0750401	MSigDB
M_PHASE_OF_MITOTIC_CELL_CYCLE	77	-1.55454	0.00840336	0.0759749	MSigDB
TRANSLATIONAL_INITIATION	36	-1.54526	0.0341615	0.0804859	MSigDB
KEGG_CYTOSOLIC_DNA_SENSING_PATHWAY	30	-1.53404	0.028169	0.0862872	MSigDB
REACTOME_DOUBLE_STRAND_BREAK_REPAIR	22	-1.53273	0.0237389	0.0864407	MSigDB
REACTOME_RESOLUTION_OF_AP_SITES_VIA_THE_MULTIPLE_NUCLEOTIDE_PATCH_REPLACEMENT_PATHWAY	16	-1.53022	0.0493507	0.0872881	MSigDB
REACTOME_MRNA_CAPPING	27	-1.52395	0.0436047	0.0906158	MSigDB
REACTOME_METABOLISM_OF_AMINO_ACIDS_AND_DERIVATIVES	124	-1.51069	0	0.0981599	MSigDB
HALLMARK_OXIDATIVE_PHOSPHORYLATION	192	-1.51001	0	0.0981311	MSigDB
REACTOME_METABOLISM_OF_PROTEINS	358	-1.50772	0	0.0990701	MSigDB
PID_E2F_PATHWAY	67	-1.50227	0.0272374	0.0997325	MSigDB
MEIOTIC_CELL_CYCLE	24	-1.4999	0.0411765	0.099249	MSigDB
REACTOME_MITOTIC_G2_G2_M_PHASES	76	-1.49868	0.0125523	0.0996888	MSigDB
